# Supplementary material
Source: Research Square preprint supplement (doi:10.21203/rs.3.rs-9892839/v1)
Supplement: Supplementary file 1 [file 908897165a11481d86941d62.docx]

**Design, Synthesis And Cytotoxicity Of Pyrrolo[2,3-d]Pyrimidine Linked Diazospiro And Piperazine – Piperidine Libraries**

Sridhar Guda,a,b , Krishna Reddy.V b. Vishnu Thumma,c  Srilakshmi V Patri,a* , Santosh Kumar Guru d.

a Department of Chemistry, National Institute of Technology, Warangal - 5060004, Telangana, India.

b Aragen Life Sciences Pvt Ltd., Medicinal Chemistry Laboratory Division, IDA Mallapur, Hyderabad – 500076, Telangana, India.

c Department of Sciences and Humanities, Matrusri Engineering College, Hyderabad – 500059, Telangana, India.

d National Institutes of Pharmaceutical Education and Research, Hyderabad-

500 037, Telangana, India

Correspond author email:

**Spectral Copies**

**
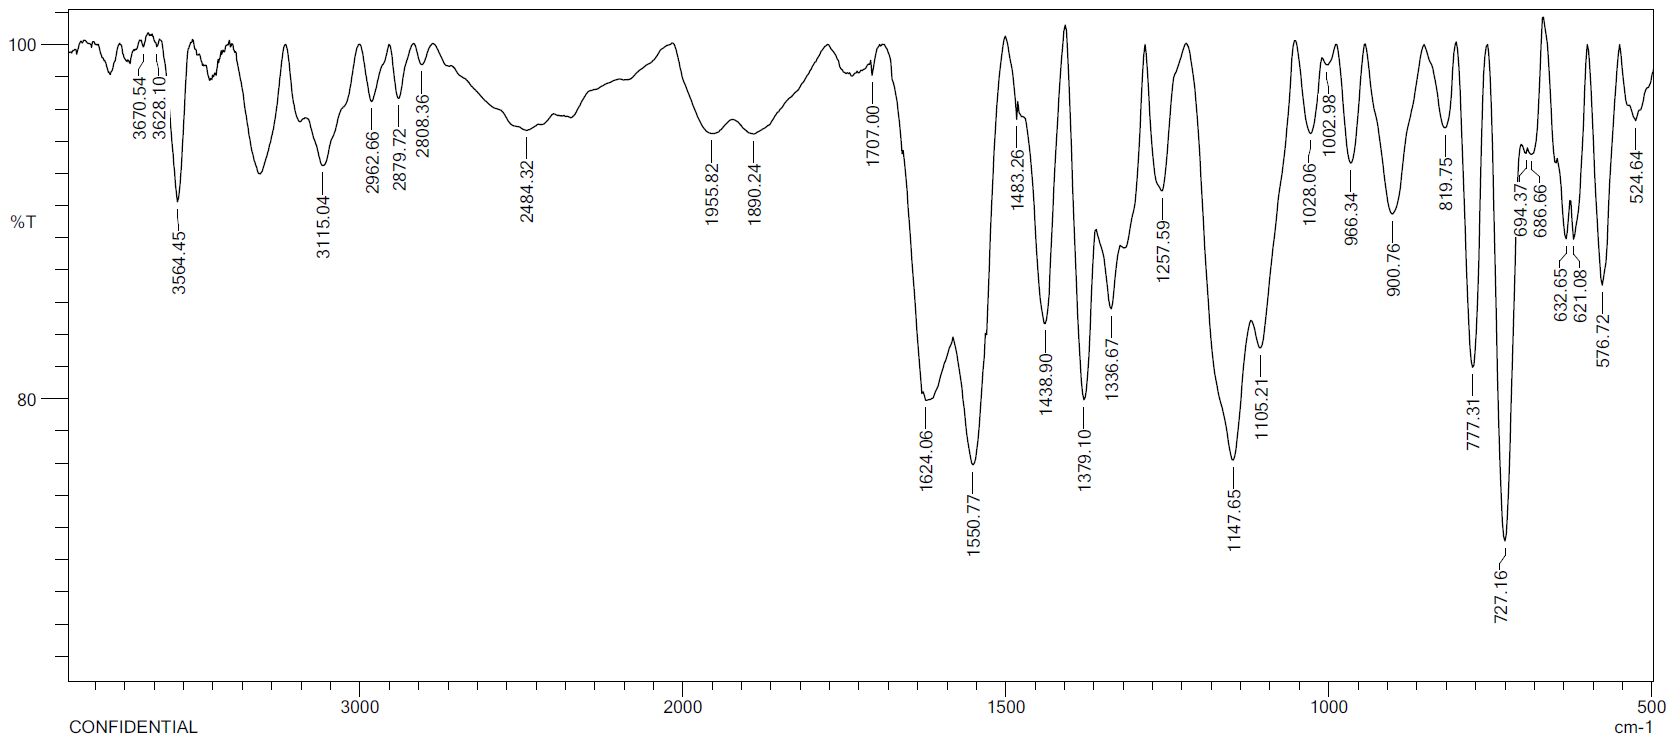
**

**IR spectrum of 4-(2-((2-(trifluoromethyl)phenyl)sulfonyl)-2,7-diazaspiro[3.5]nonan-7-yl)-7H-pyrrolo[2,3-d]pyrimidine (7a)**

**1H NMR spectrum of 4-(2-((2-(trifluoromethyl)phenyl)sulfonyl)-2,7-diazaspiro[3.5]nonan-7-yl)-7H-pyrrolo[2,3-d]pyrimidine (7a)**

**13C NMR spectrum of 4-(2-((2-(trifluoromethyl)phenyl)sulfonyl)-2,7-diazaspiro[3.5]nonan-7-yl)-7H-pyrrolo[2,3-d]pyrimidine (7a)**

**
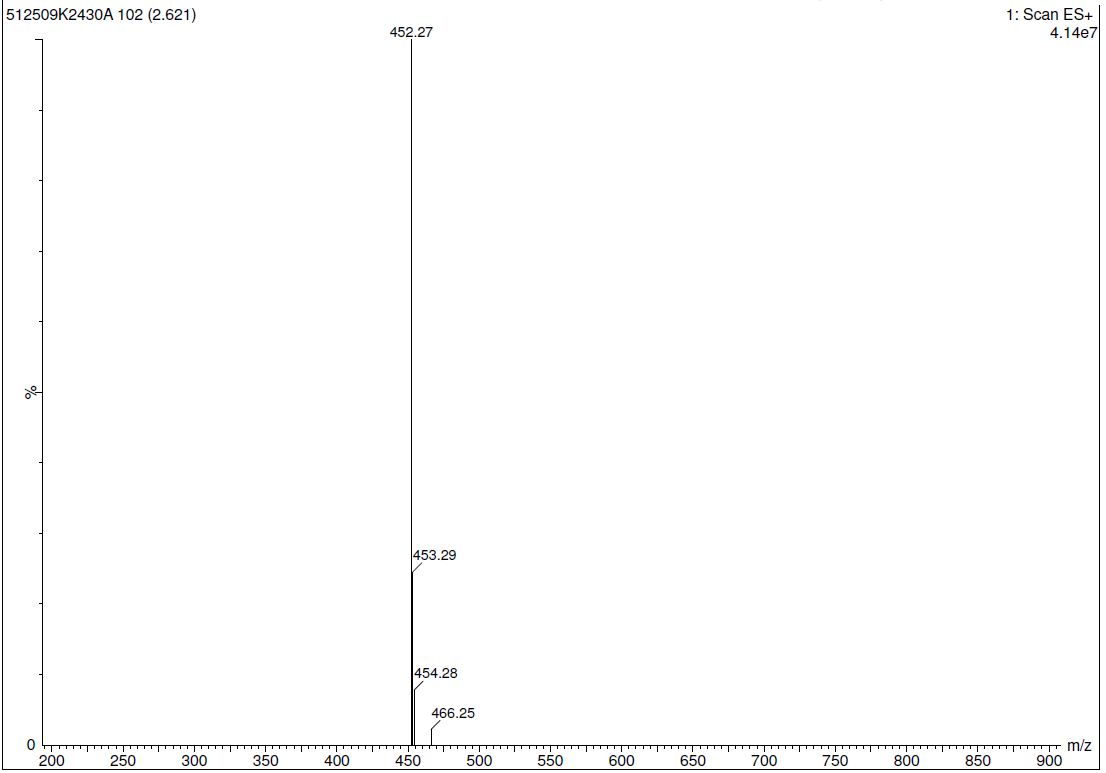
**

**Mass spectrum of 4-(2-((2-(trifluoromethyl)phenyl)sulfonyl)-2,7-diazaspiro[3.5]nonan-7-yl)-7H-pyrrolo[2,3-d]pyrimidine (7a)**

**
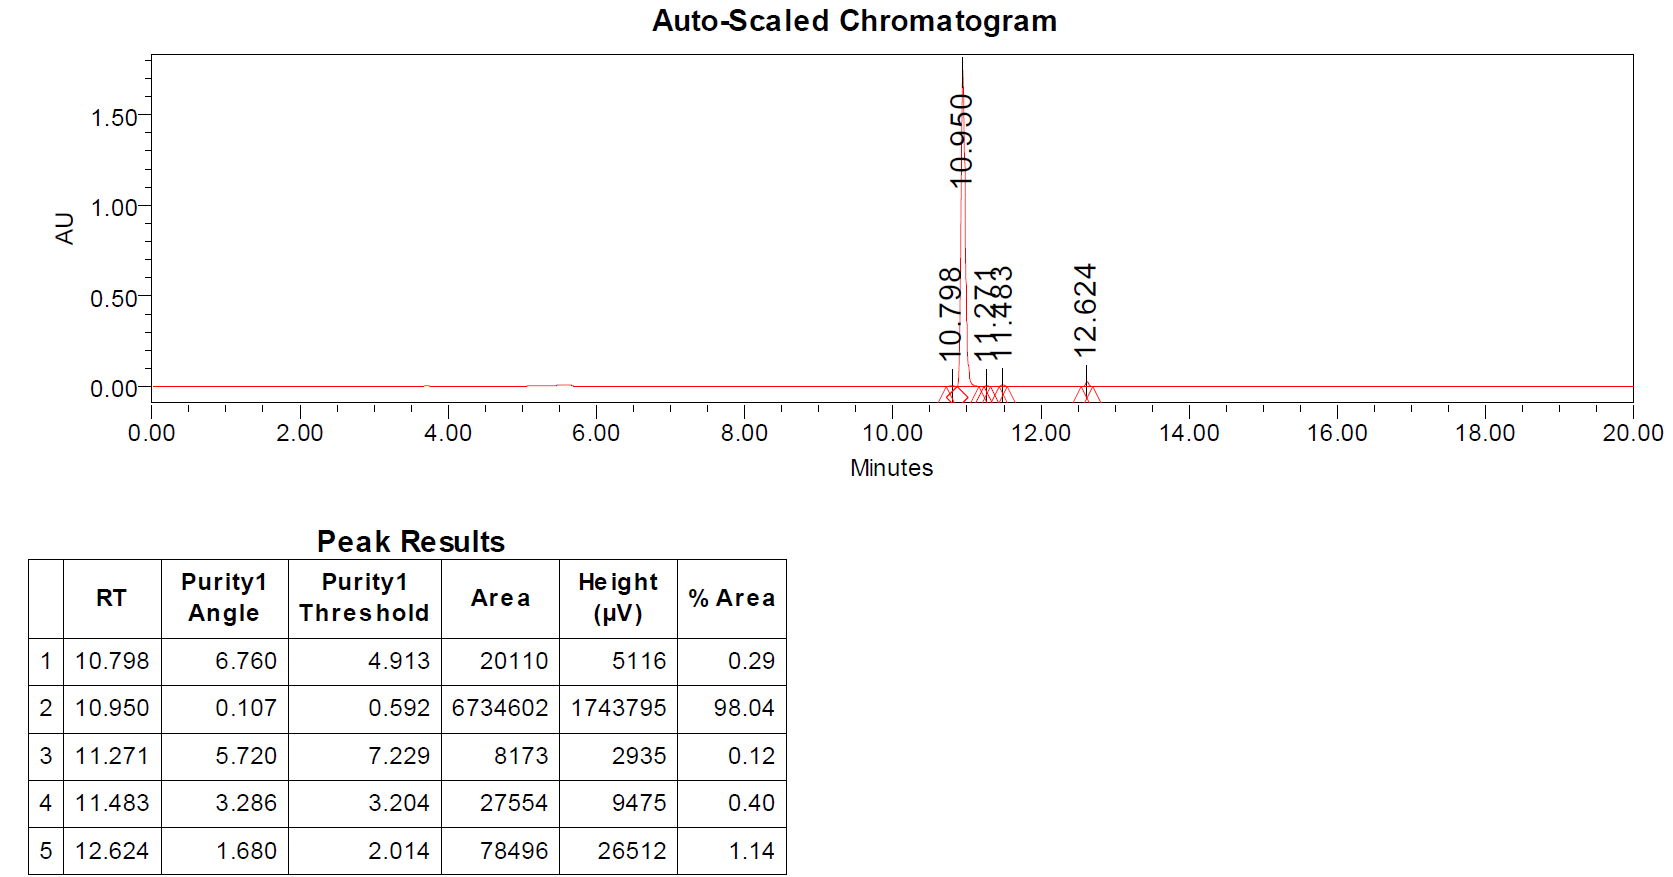
**

**HPLC of 4-(2-((2-(trifluoromethyl)phenyl)sulfonyl)-2,7-diazaspiro[3.5]nonan-7-yl)-7H-pyrrolo[2,3-d]pyrimidine (7a)**

**
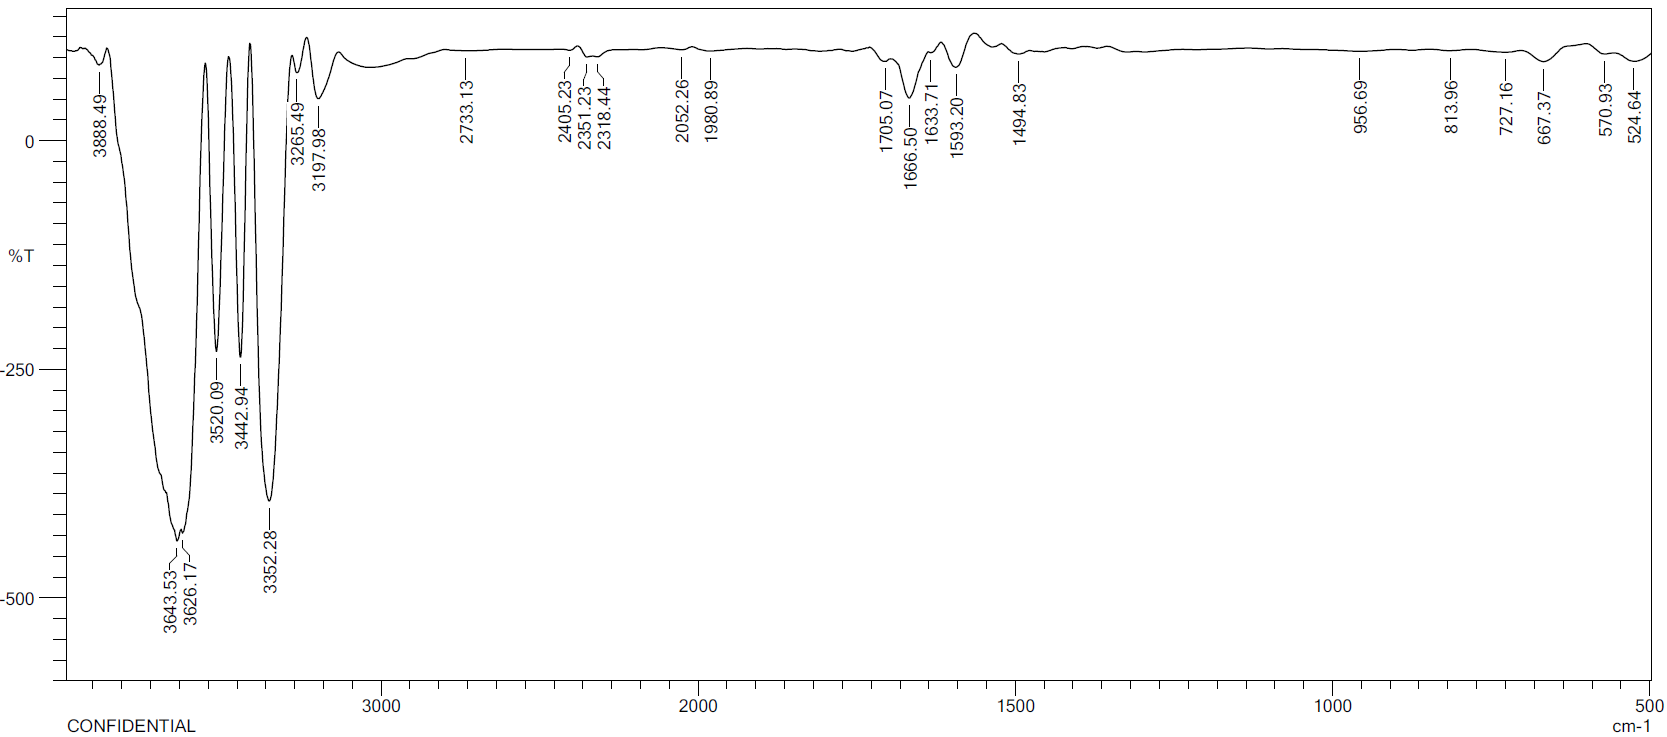
**

**IR spectrum of 4-(2-((4-bromophenyl)sulfonyl)-2,7-diazaspiro[3.5]nonan-7-yl)-7H-pyrrolo[2,3-d]pyrimidine (7b)**

**1H NMR spectrum of 4-(2-((4-bromophenyl)sulfonyl)-2,7-diazaspiro[3.5]nonan-7-yl)-7H-pyrrolo[2,3-d]pyrimidine (7b)**

**13C NMR spectrum of 4-(2-((4-bromophenyl)sulfonyl)-2,7-diazaspiro[3.5]nonan-7-yl)-7H-pyrrolo[2,3-d]pyrimidine (7b)**

**
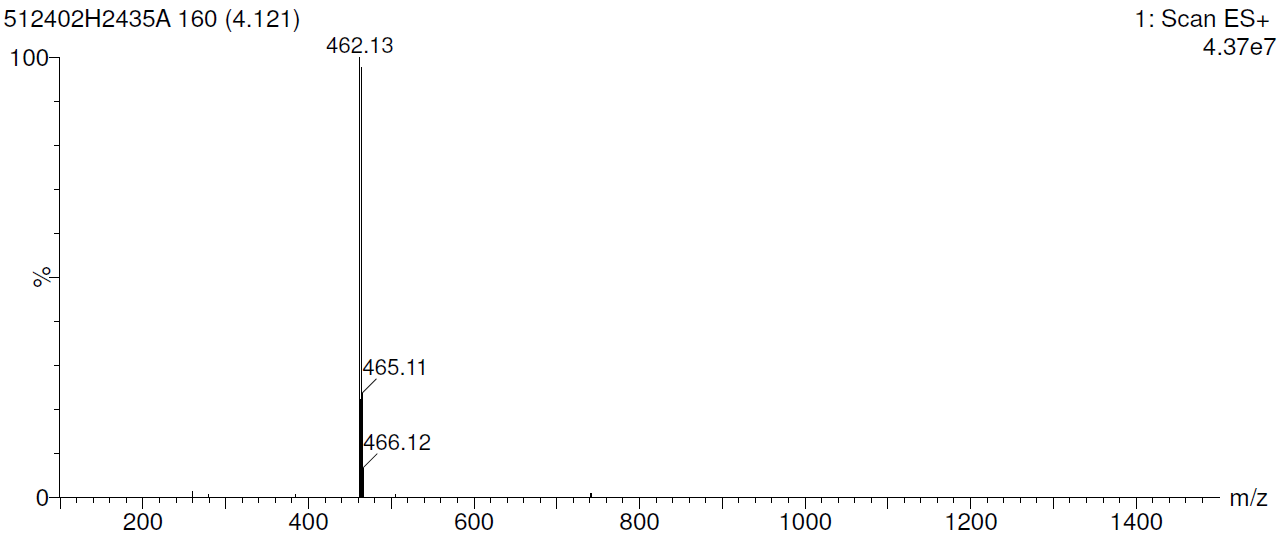
**

**Mass spectrum of 4-(2-((4-bromophenyl)sulfonyl)-2,7-diazaspiro[3.5]nonan-7-yl)-7H-pyrrolo[2,3-d]pyrimidine (7b)**

**
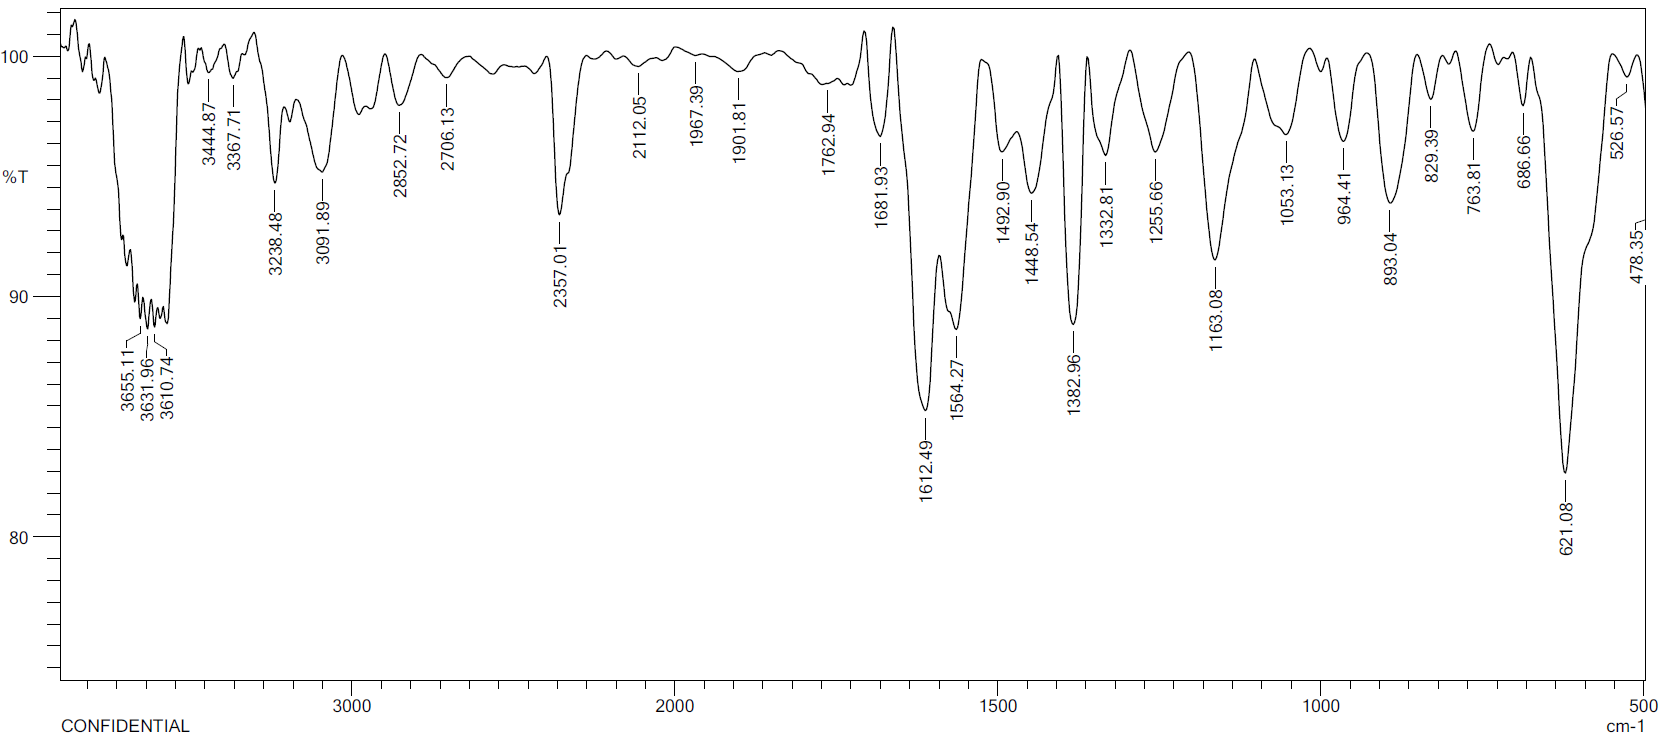
**

**IR spectrum of 4-(2-((3-bromophenyl)sulfonyl)-2,7-diazaspiro[3.5]nonan-7-yl)-7H-pyrrolo[2,3-d]pyrimidine (7c)**

**1H NMR spectrum of 4-(2-((3-bromophenyl)sulfonyl)-2,7-diazaspiro[3.5]nonan-7-yl)-7H-pyrrolo[2,3-d]pyrimidine (7c)**

**13C NMR spectrum of 4-(2-((3-bromophenyl)sulfonyl)-2,7-diazaspiro[3.5]nonan-7-yl)-7H-pyrrolo[2,3-d]pyrimidine (7c)**

**
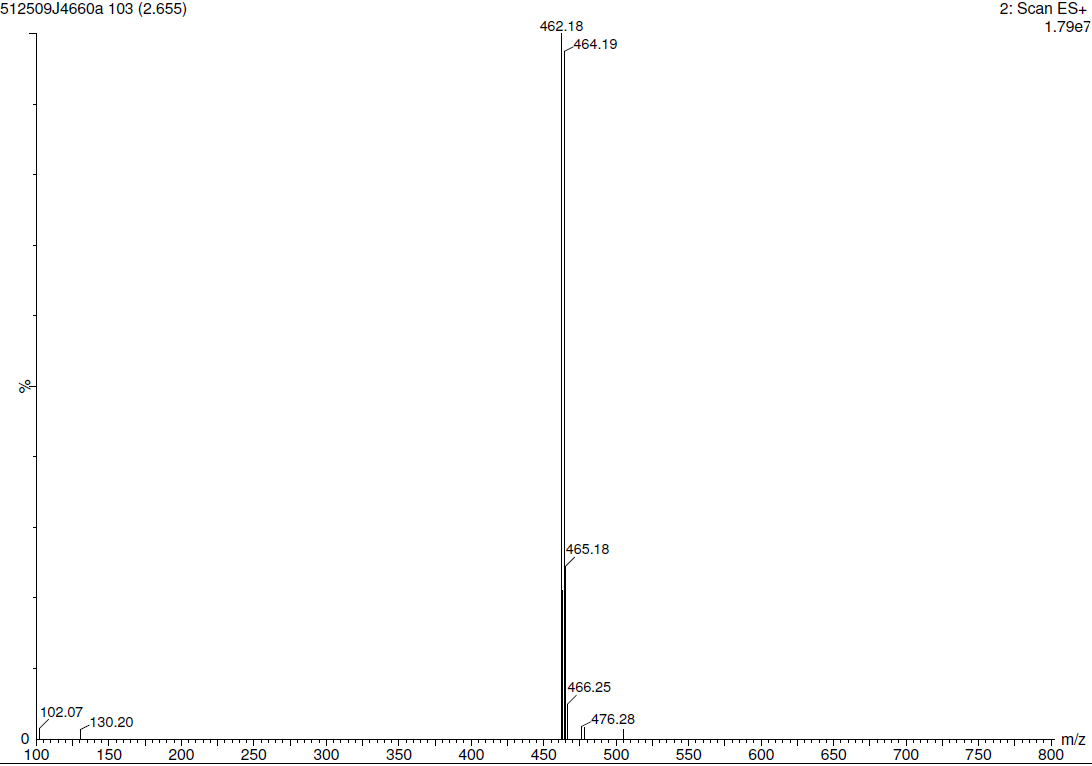
**

**Mass spectrum of 4-(2-((3-bromophenyl)sulfonyl)-2,7-diazaspiro[3.5]nonan-7-yl)-7H-pyrrolo[2,3-d]pyrimidine (7c)**

**
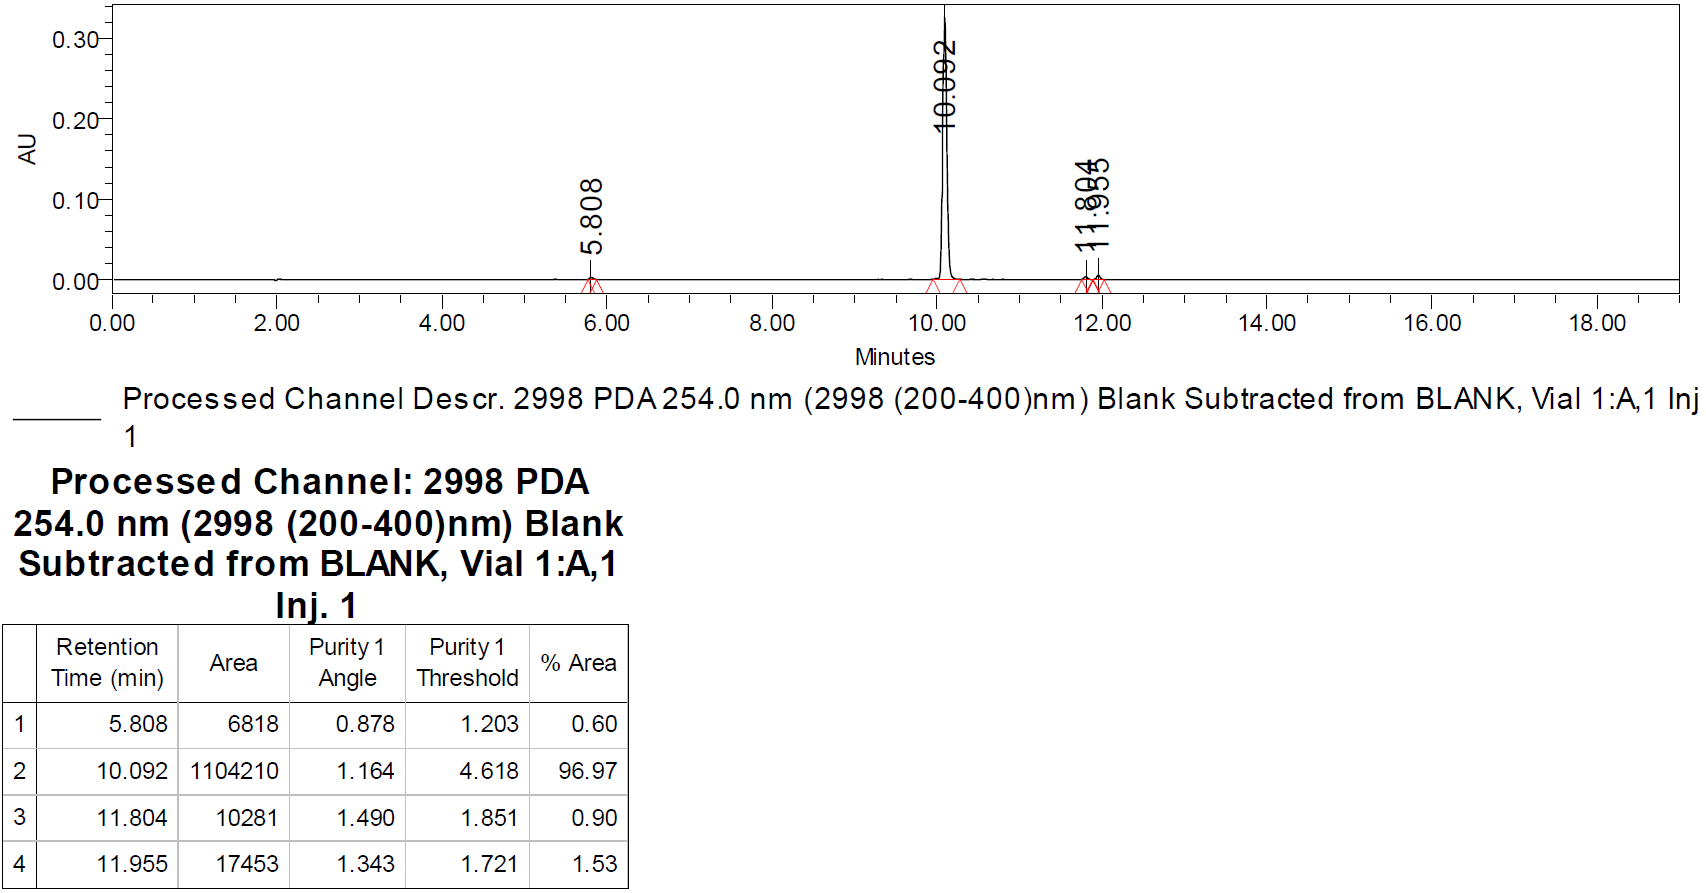
**

**HPLC of 4-(2-((3-bromophenyl)sulfonyl)-2,7-diazaspiro[3.5]nonan-7-yl)-7H-pyrrolo[2,3-d]pyrimidine (7c)**

**
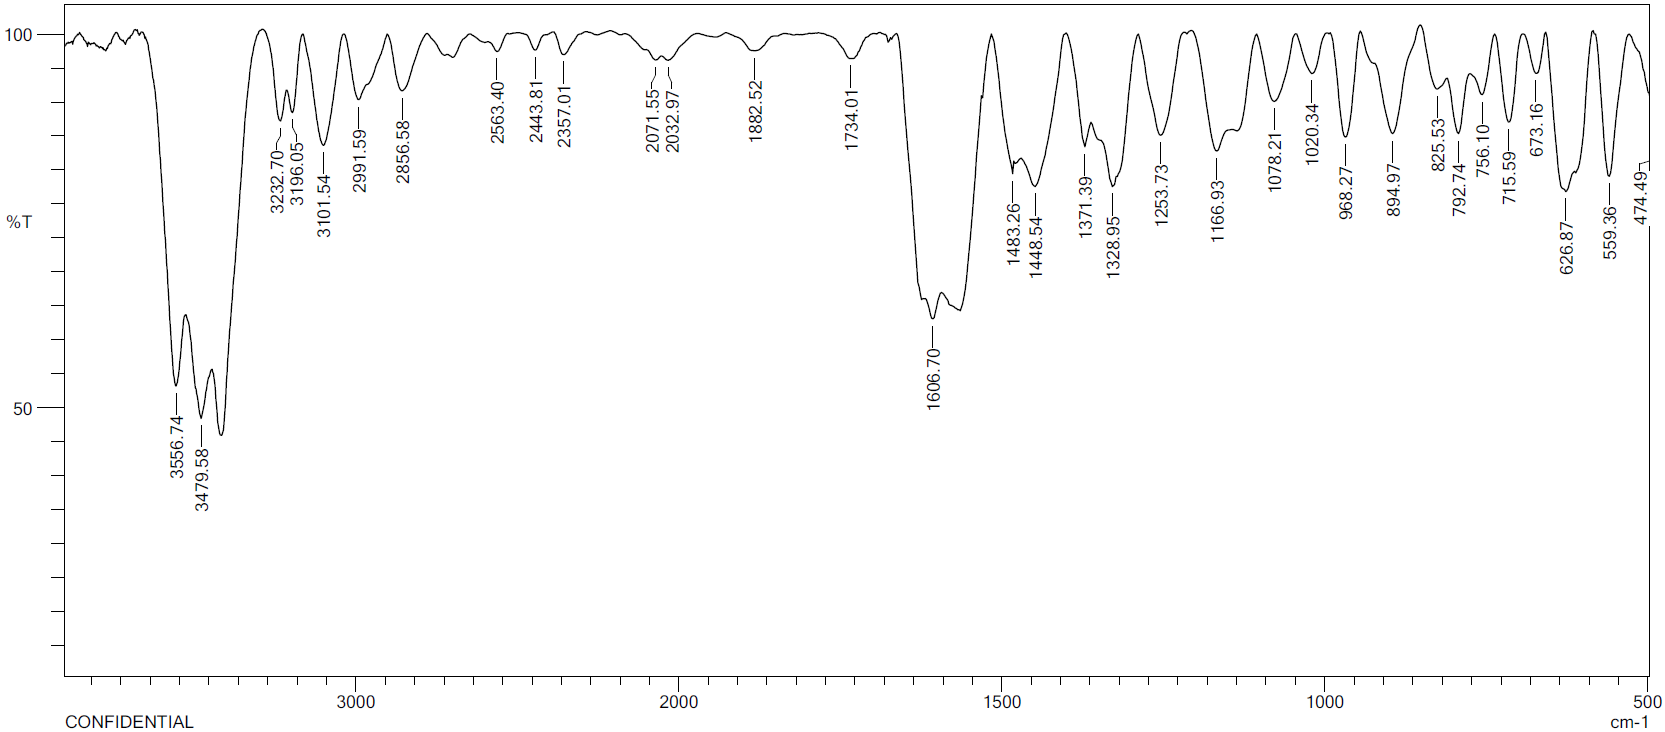
**

**IR spectrum of 4-(2-((cyclopropylmethyl)sulfonyl)-2,7-diazaspiro[3.5]nonan-7-yl)-7H-pyrrolo[2,3-d]pyrimidine (7d)**

**1H NMR spectrum of 4-(2-((cyclopropylmethyl)sulfonyl)-2,7-diazaspiro[3.5]nonan-7-yl)-7H-pyrrolo[2,3-d]pyrimidine (7d)**

**13C NMR spectrum of 4-(2-((cyclopropylmethyl)sulfonyl)-2,7-diazaspiro[3.5]nonan-7-yl)-7H-pyrrolo[2,3-d]pyrimidine (7d)**

**
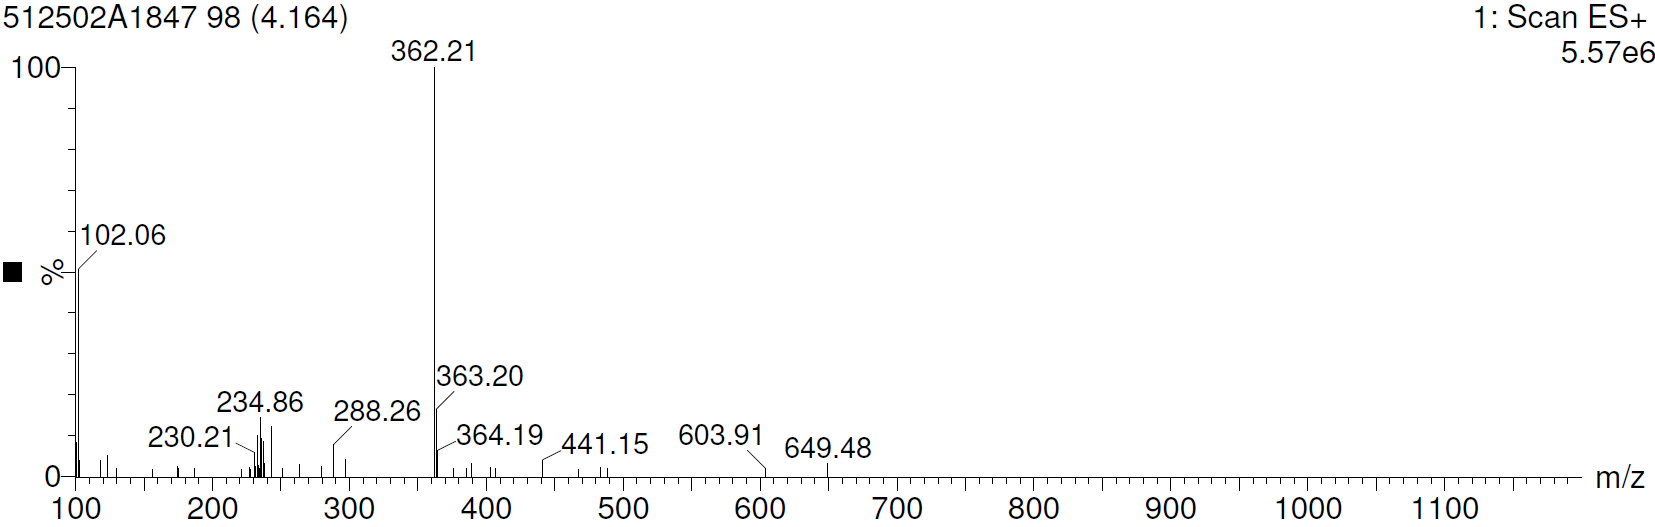
**

**Mass spectrum of 4-(2-((cyclopropylmethyl)sulfonyl)-2,7-diazaspiro[3.5]nonan-7-yl)-7H-pyrrolo[2,3-d]pyrimidine (7d)**

**
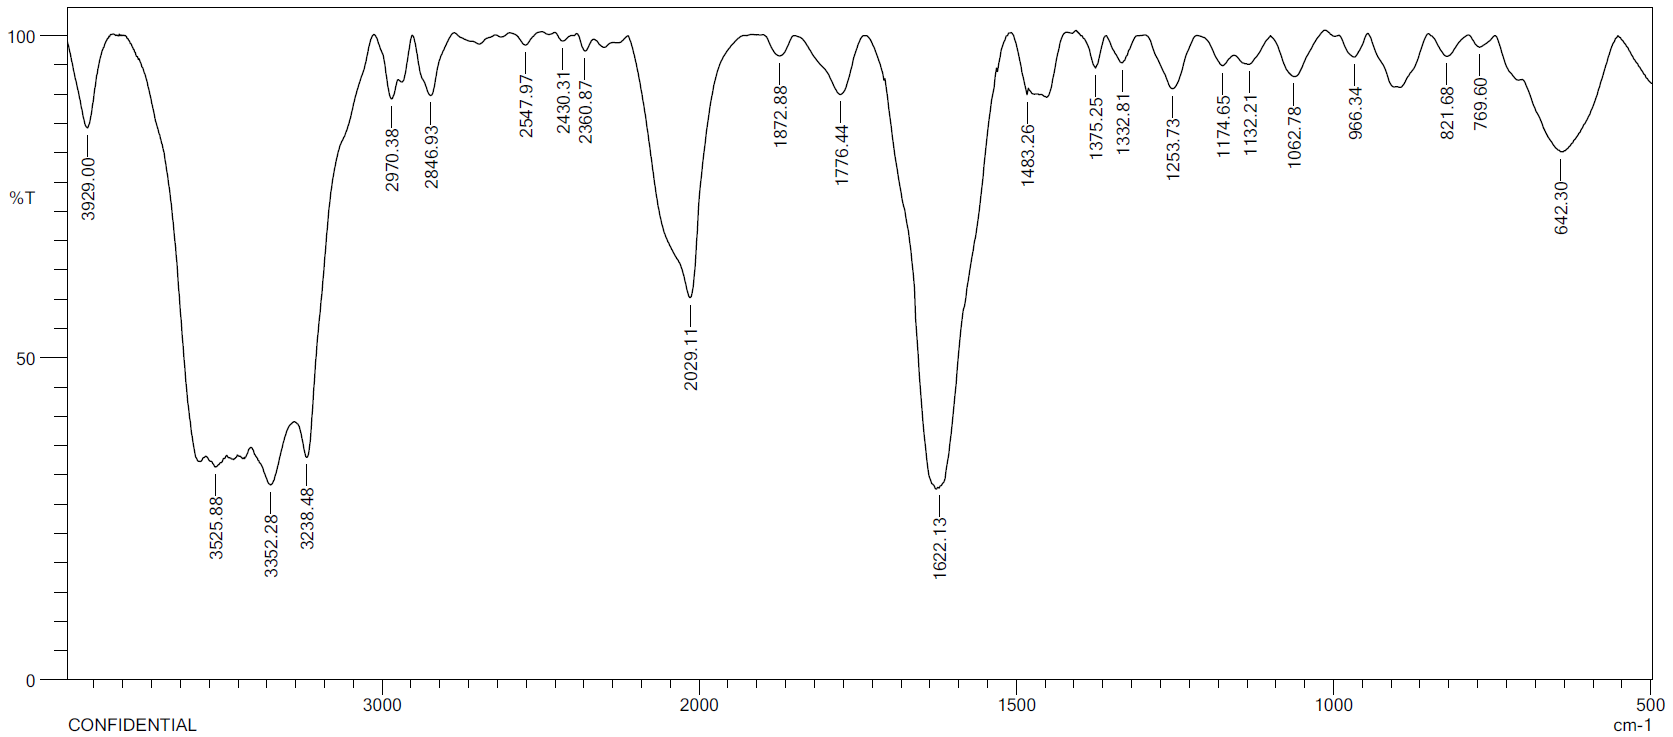
**

**IR spectrum of 4-(2-(propylsulfonyl)-2,7-diazaspiro[3.5]nonan-7-yl)-7H-pyrrolo[2,3-d]pyrimidine (7e)**

**1H NMR spectrum of 4-(2-(propylsulfonyl)-2,7-diazaspiro[3.5]nonan-7-yl)-7H-pyrrolo[2,3-d]pyrimidine (7e)**

**13C NMR spectrum of 4-(2-(propylsulfonyl)-2,7-diazaspiro[3.5]nonan-7-yl)-7H-pyrrolo[2,3-d]pyrimidine (7e)**

**
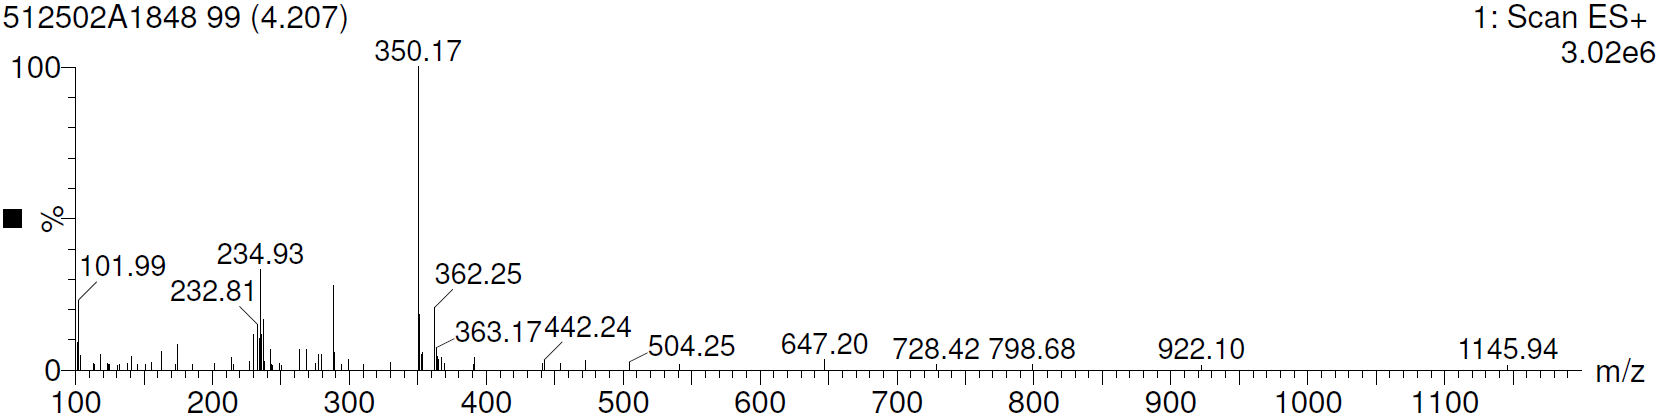
**

**Mass spectrum of 4-(2-(propylsulfonyl)-2,7-diazaspiro[3.5]nonan-7-yl)-7H-pyrrolo[2,3-d]pyrimidine (7e)**

**
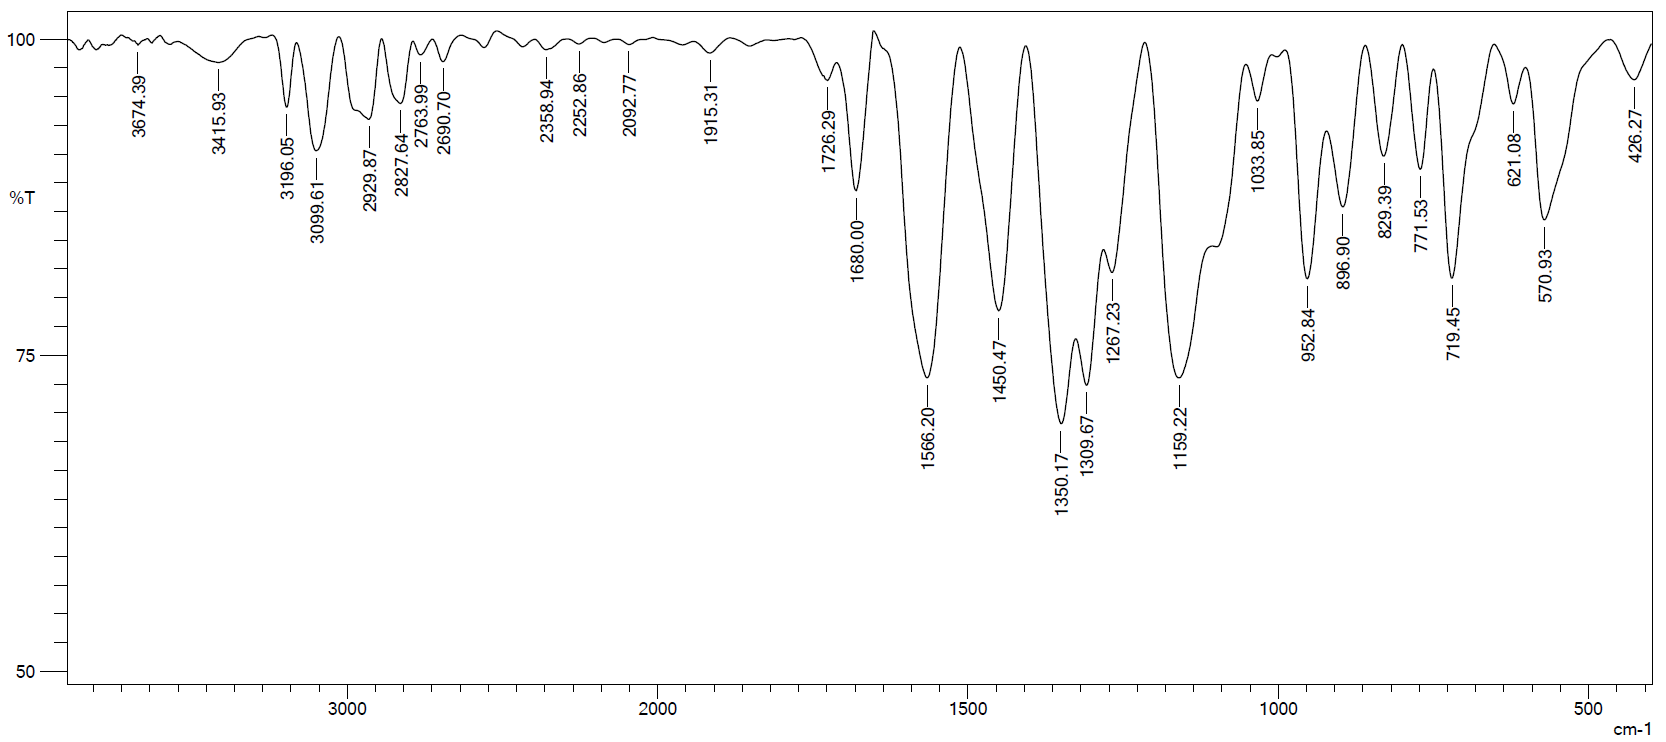
**

**IR spectrum of 4-(4-((1-((2-(trifluoromethyl)phenyl)sulfonyl)piperidin-4-yl)methyl)piperazin-1-yl)-7H-pyrrolo[2,3-d]pyrimidine (12a)**

**1H NMR spectrum of 4-(4-((1-((2-(trifluoromethyl)phenyl)sulfonyl)piperidin-4-yl)methyl)piperazin-1-yl)-7H-pyrrolo[2,3-d]pyrimidine (12a)**

**13C NMR spectrum of 4-(4-((1-((2-(trifluoromethyl)phenyl)sulfonyl)piperidin-4-yl)methyl)piperazin-1-yl)-7H-pyrrolo[2,3-d]pyrimidine (12a)**

**
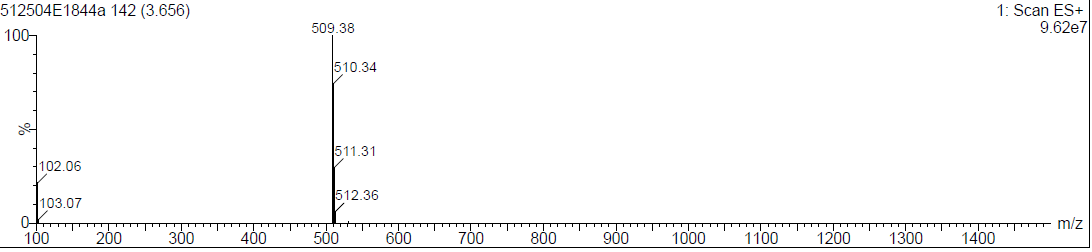
**

**Mass spectrum of 4-(4-((1-((2-(trifluoromethyl)phenyl)sulfonyl)piperidin-4-yl)methyl)piperazin-1-yl)-7H-pyrrolo[2,3-d]pyrimidine (12a)**

**
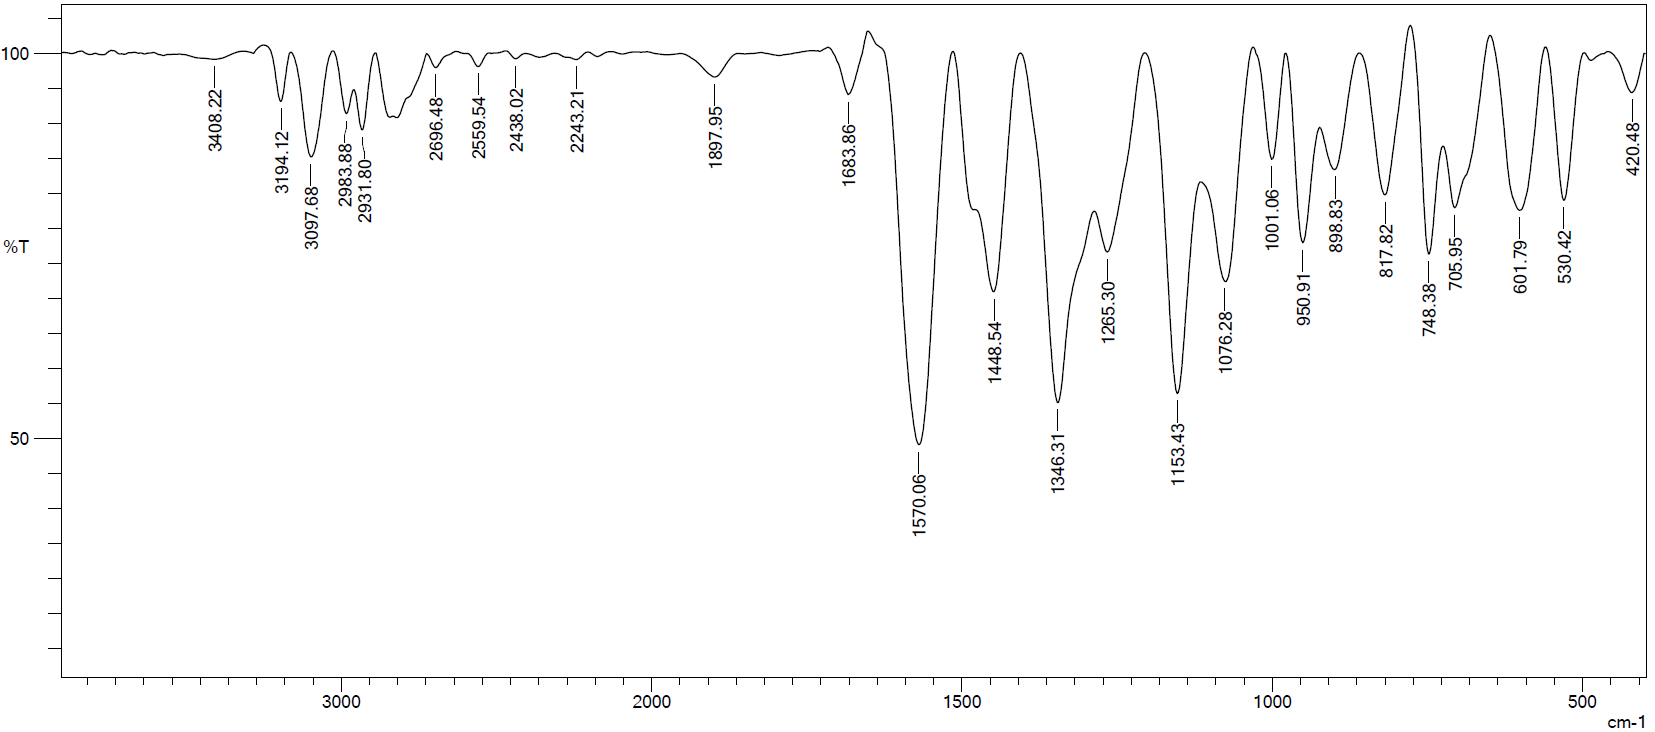
**

**IR spectrum of 4-(4-((1-((4-bromophenyl)sulfonyl)piperidin-4-yl)methyl)piperazin-1-yl)-7H-pyrrolo[2,3-d]pyrimidine (12b)**

**1H NMR spectrum of 4-(4-((1-((4-bromophenyl)sulfonyl)piperidin-4-yl)methyl)piperazin-1-yl)-7H-pyrrolo[2,3-d]pyrimidine (12b)**

**
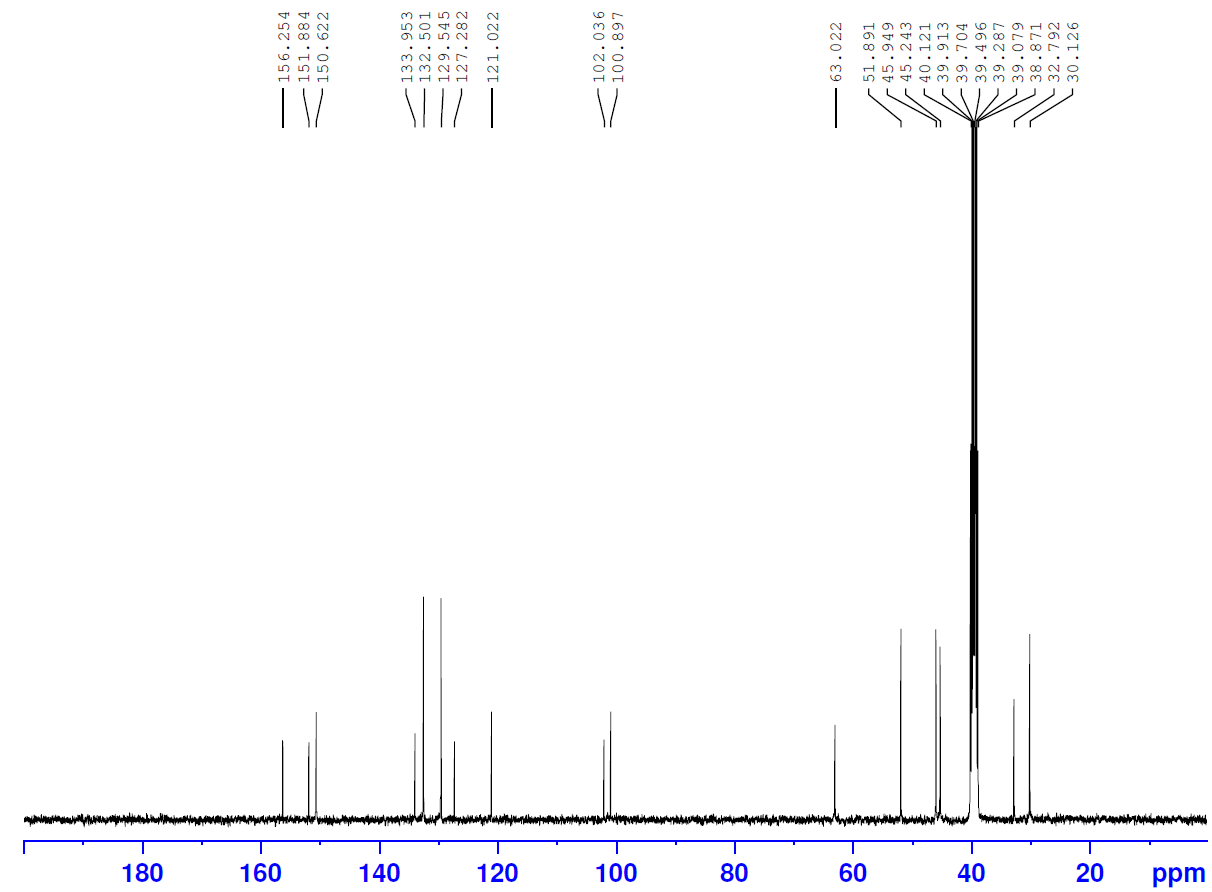
**

**13C NMR spectrum of 4-(4-((1-((4-bromophenyl)sulfonyl)piperidin-4-yl)methyl)piperazin-1-yl)-7H-pyrrolo[2,3-d]pyrimidine (12b)**

**
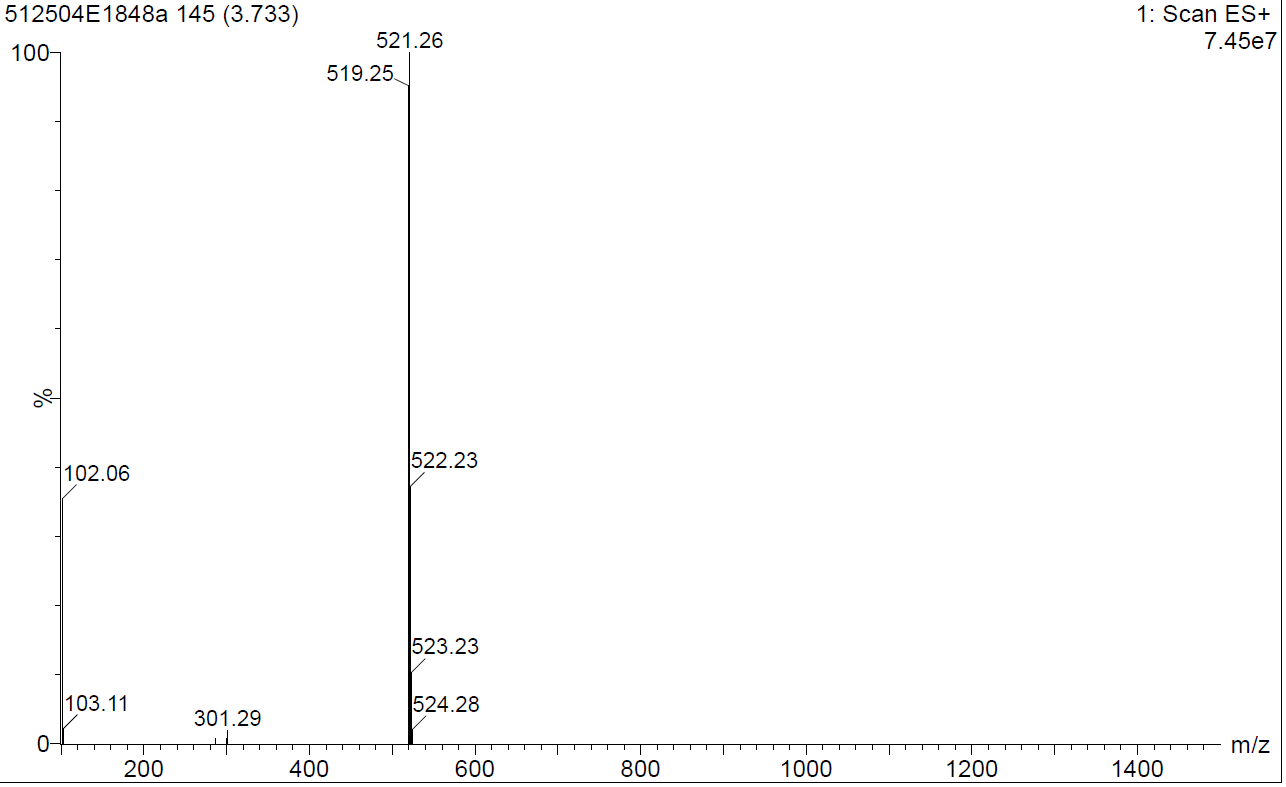
**

**Mass spectrum of 4-(4-((1-((4-bromophenyl)sulfonyl)piperidin-4-yl)methyl)piperazin-1-yl)-7H-pyrrolo[2,3-d]pyrimidine (12b)**

**
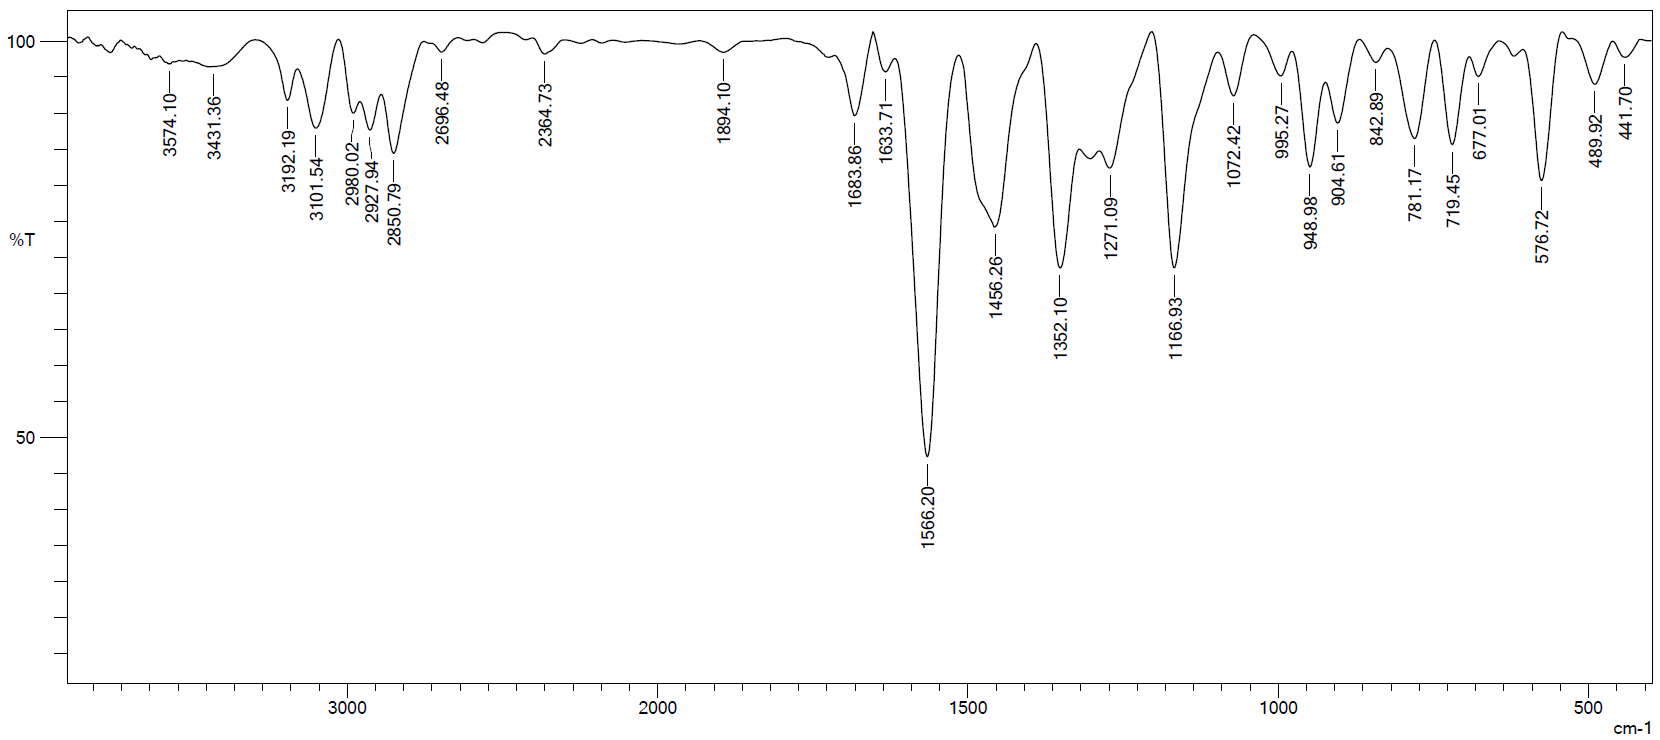
**

**IR spectrum of 4-(4-((1-((2-bromophenyl)sulfonyl)piperidin-4-yl)methyl)piperazin-1-yl)-7H-pyrrolo[2,3-d]pyrimidine (12c)**

**1H NMR spectrum of 4-(4-((1-((2-bromophenyl)sulfonyl)piperidin-4-yl)methyl)piperazin-1-yl)-7H-pyrrolo[2,3-d]pyrimidine (12c)**

**13C NMR spectrum of 4-(4-((1-((2-bromophenyl)sulfonyl)piperidin-4-yl)methyl)piperazin-1-yl)-7H-pyrrolo[2,3-d]pyrimidine (12c)**

**
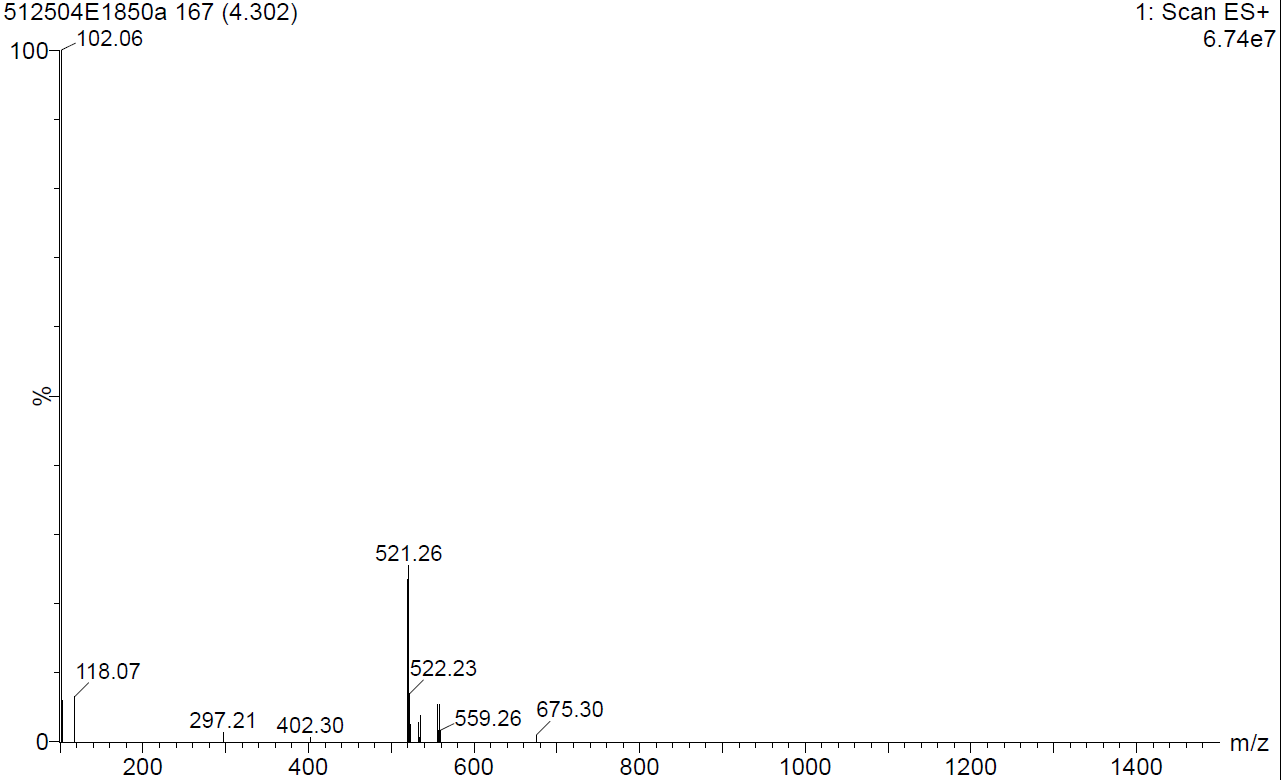
**

**Mass spectrum of 4-(4-((1-((2-bromophenyl)sulfonyl)piperidin-4-yl)methyl)piperazin-1-yl)-7H-pyrrolo[2,3-d]pyrimidine (12c)**

**
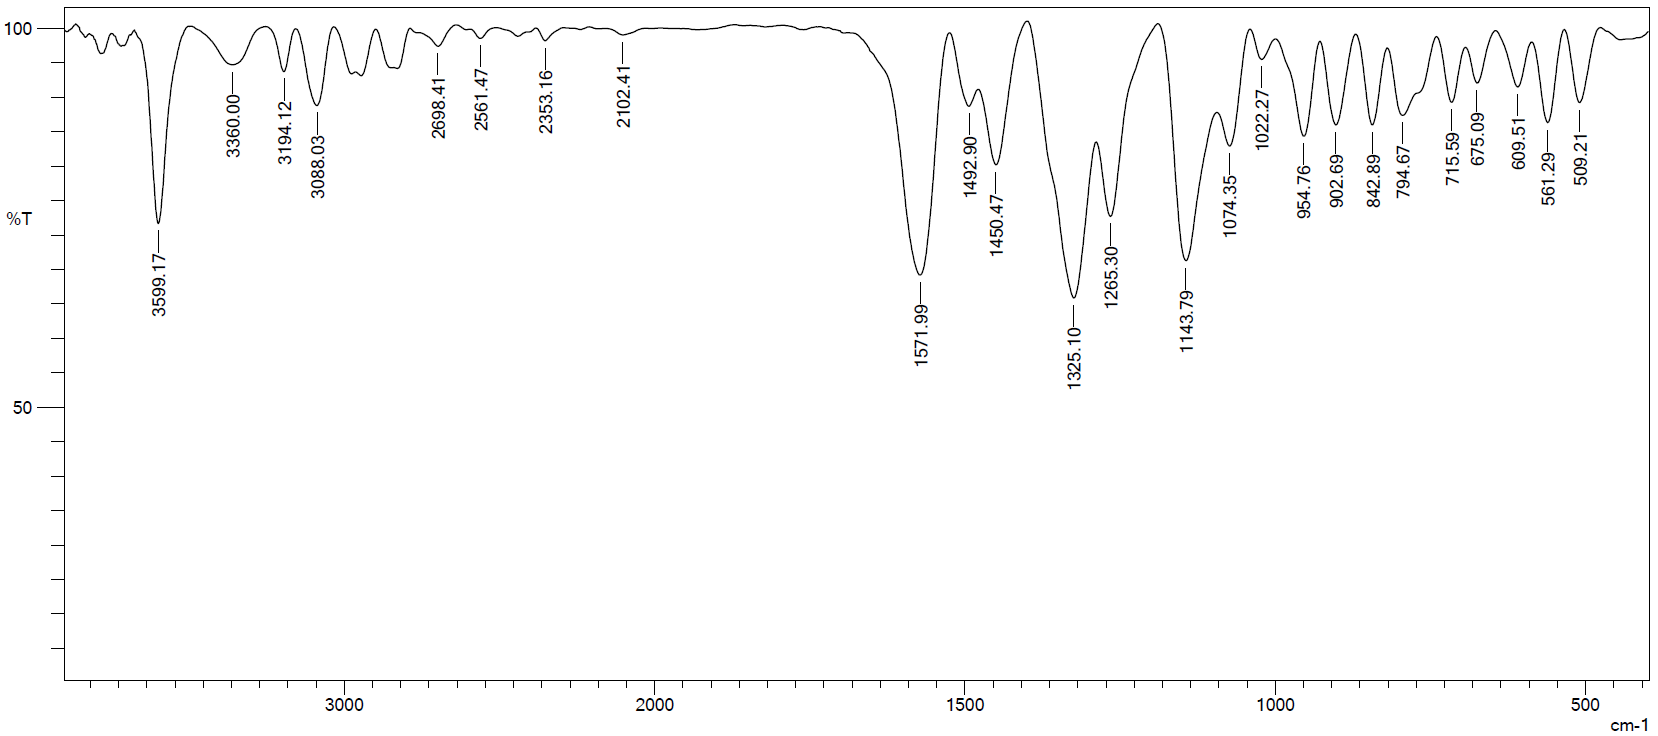
**

**IR spectrum of4-(4-((1-((cyclopropylmethyl)sulfonyl)piperidin-4-yl)methyl)piperazin-1-yl)-7H-pyrrolo[2,3-d]pyrimidine (12d)**

**1H NMR spectrum of4-(4-((1-((cyclopropylmethyl)sulfonyl)piperidin-4-yl)methyl)piperazin-1-yl)-7H-pyrrolo[2,3-d]pyrimidine (12d)**

**13C NMR spectrum of4-(4-((1-((cyclopropylmethyl)sulfonyl)piperidin-4-yl)methyl)piperazin-1-yl)-7H-pyrrolo[2,3-d]pyrimidine (12d)**

**
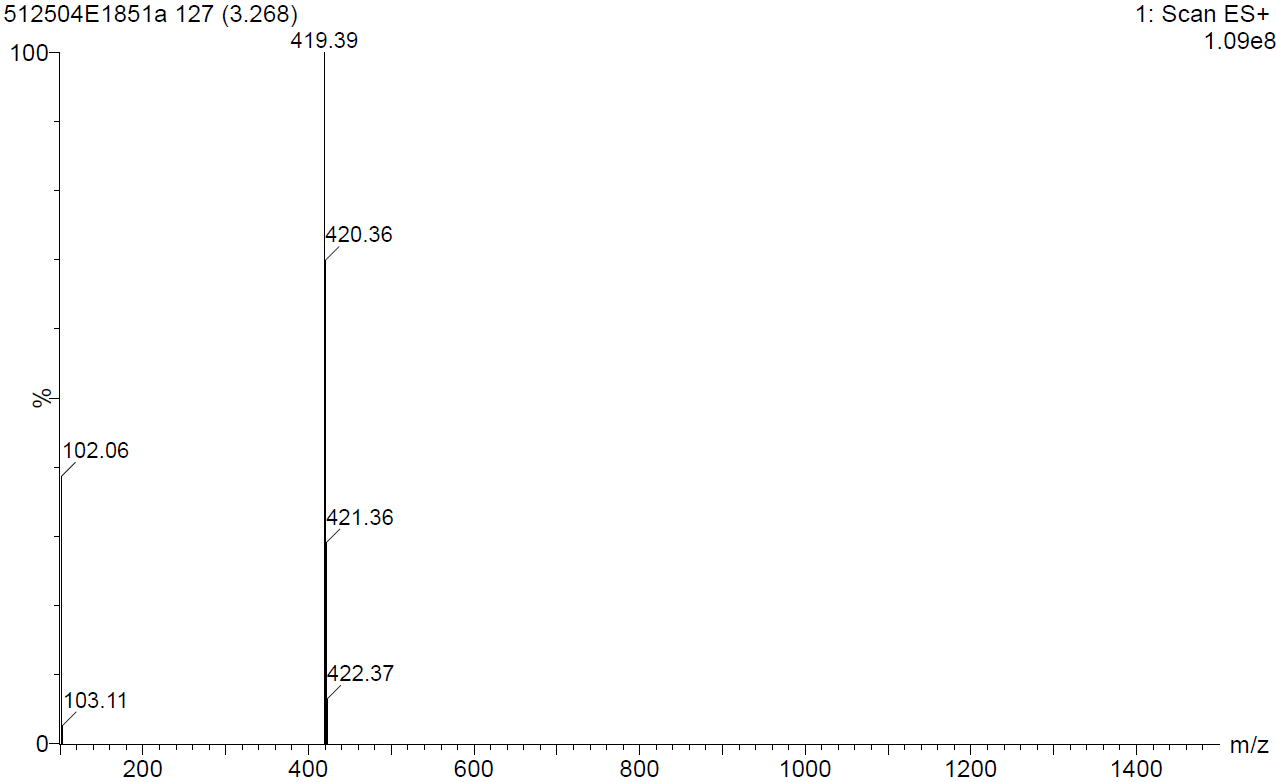
**

**Mass spectrum of4-(4-((1-((cyclopropylmethyl)sulfonyl)piperidin-4-yl)methyl)piperazin-1-yl)-7H-pyrrolo[2,3-d]pyrimidine (12d)**

**
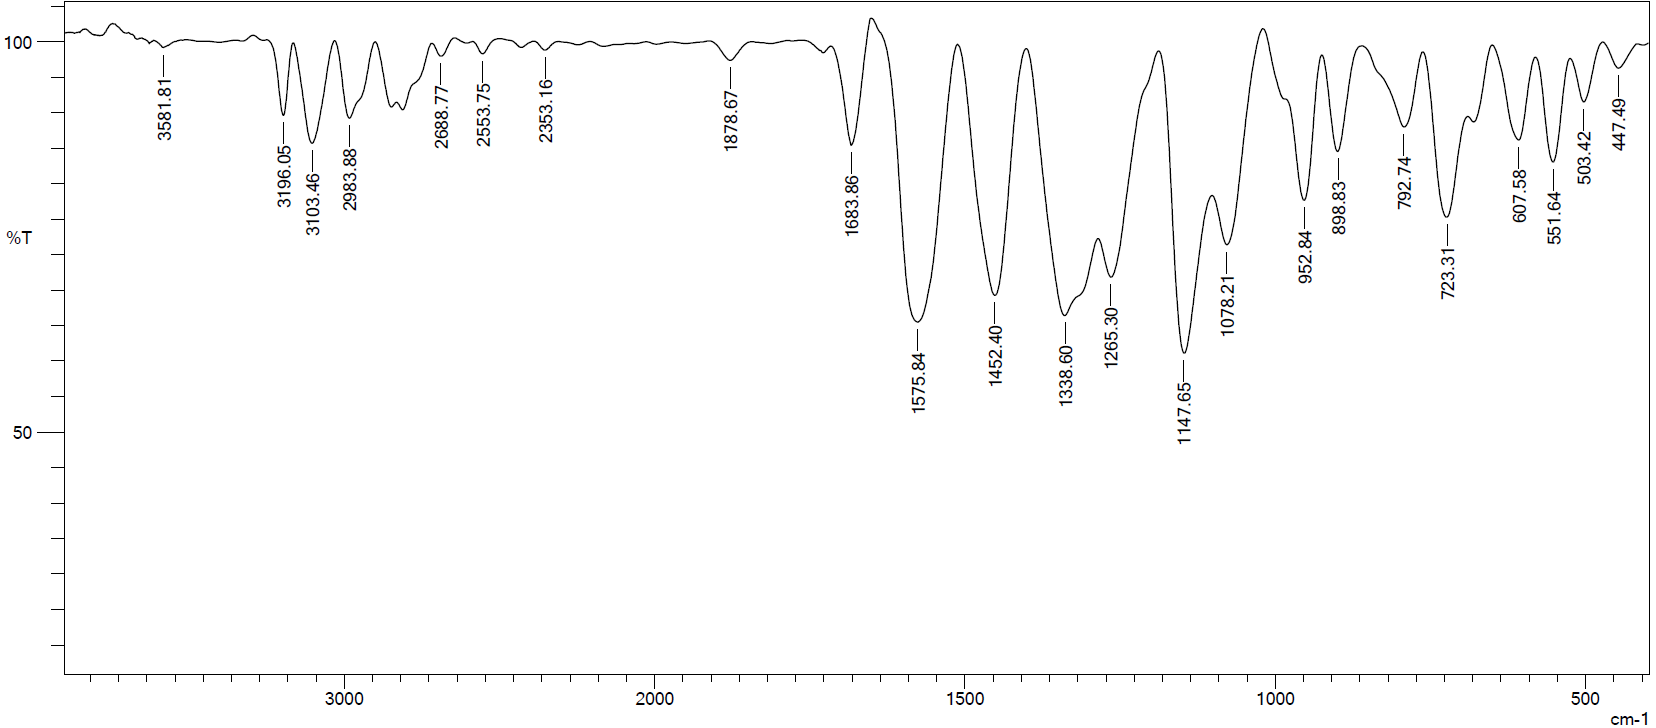
**

**IR spectrum of 4-(4-((1-(propylsulfonyl)piperidin-4-yl)methyl)piperazin-1-yl)-7H-pyrrolo[2,3-d]pyrimidine (12e)**

**1H NMR spectrum of 4-(4-((1-(propylsulfonyl)piperidin-4-yl)methyl)piperazin-1-yl)-7H-pyrrolo[2,3-d]pyrimidine (12e)**

**13C NMR spectrum of 4-(4-((1-(propylsulfonyl)piperidin-4-yl)methyl)piperazin-1-yl)-7H-pyrrolo[2,3-d]pyrimidine (12e)**

**
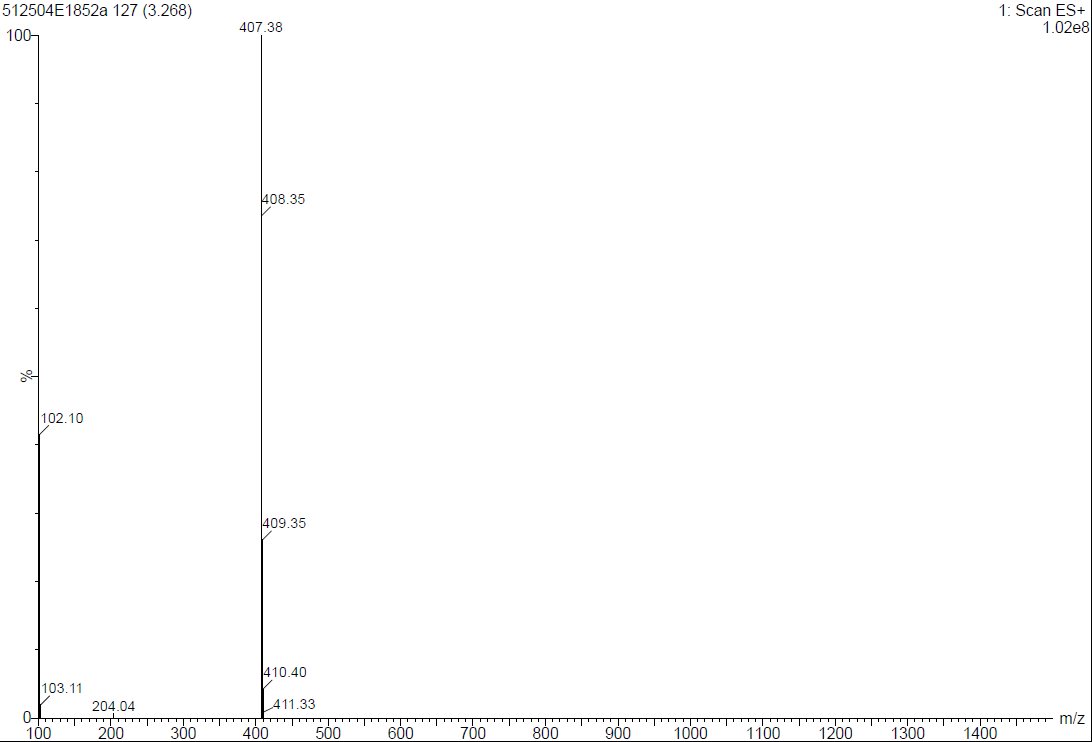
**

**Mass spectrum of 4-(4-((1-(propylsulfonyl)piperidin-4-yl)methyl)piperazin-1-yl)-7H-pyrrolo[2,3-d]pyrimidine (12e)**

**
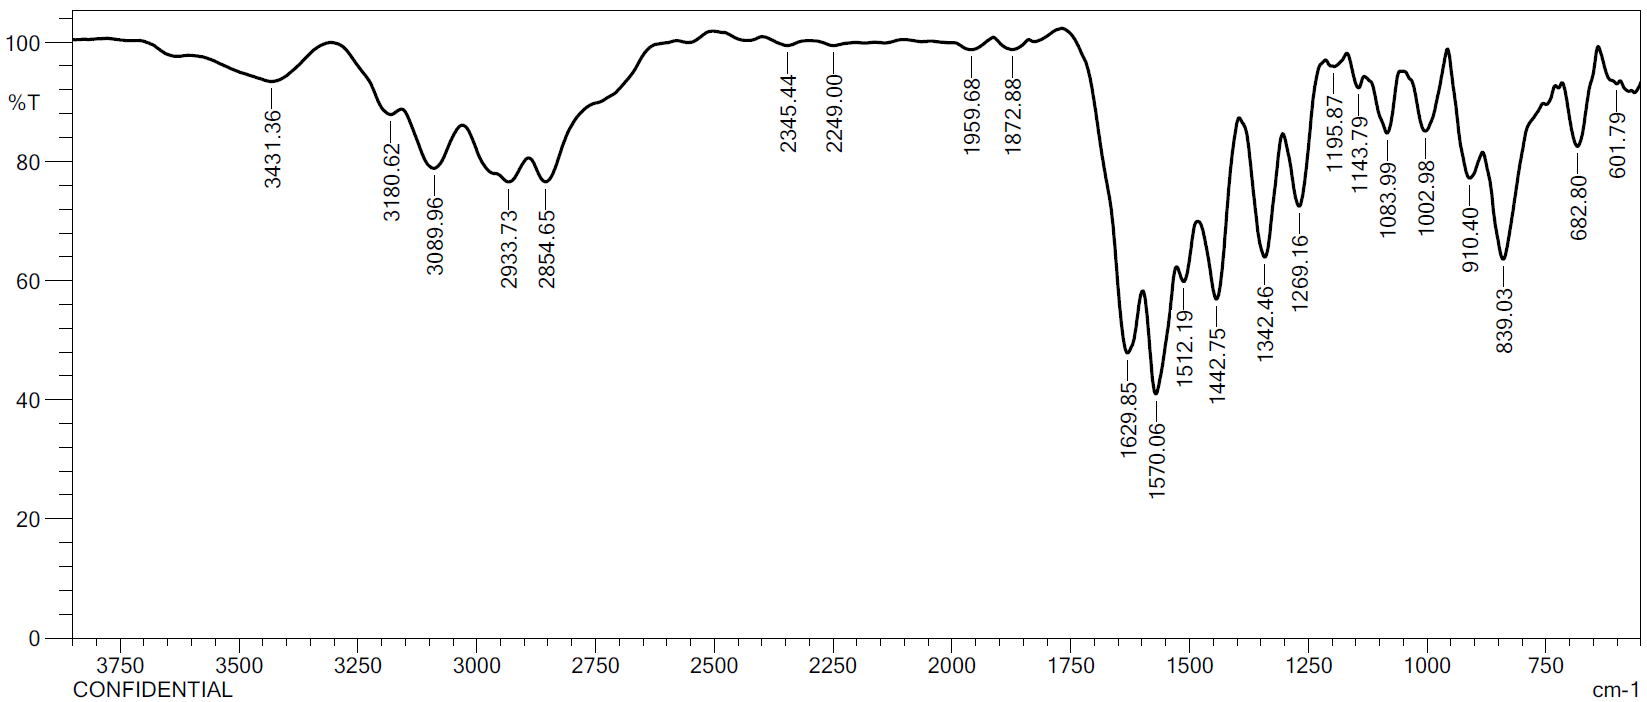
**

**IR spectrum of (9-(7H-pyrrolo[2,3-d]pyrimidin-4-yl)-3,9-diazaspiro[5.5]undecan-3-yl)(4-methyl-3-nitrophenyl)methanone (18a)**

**1H NMR spectrum of (9-(7H-pyrrolo[2,3-d]pyrimidin-4-yl)-3,9-diazaspiro[5.5]undecan-3-yl)(4-methyl-3-nitrophenyl)methanone (18a)**

**13C NMR spectrum of (9-(7H-pyrrolo[2,3-d]pyrimidin-4-yl)-3,9-diazaspiro[5.5]undecan-3-yl)(4-methyl-3-nitrophenyl)methanone (18a)**

**
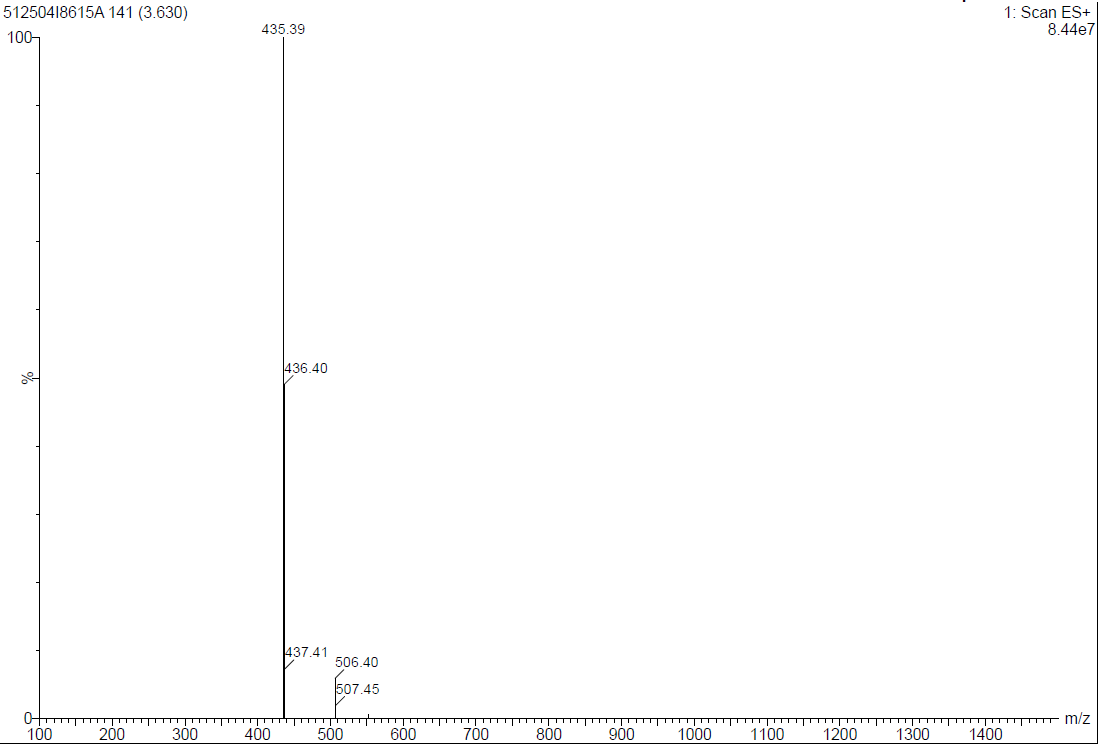
**

**Mass spectrum of (9-(7H-pyrrolo[2,3-d]pyrimidin-4-yl)-3,9-diazaspiro[5.5]undecan-3-yl)(4-methyl-3-nitrophenyl)methanone (18a)**

**
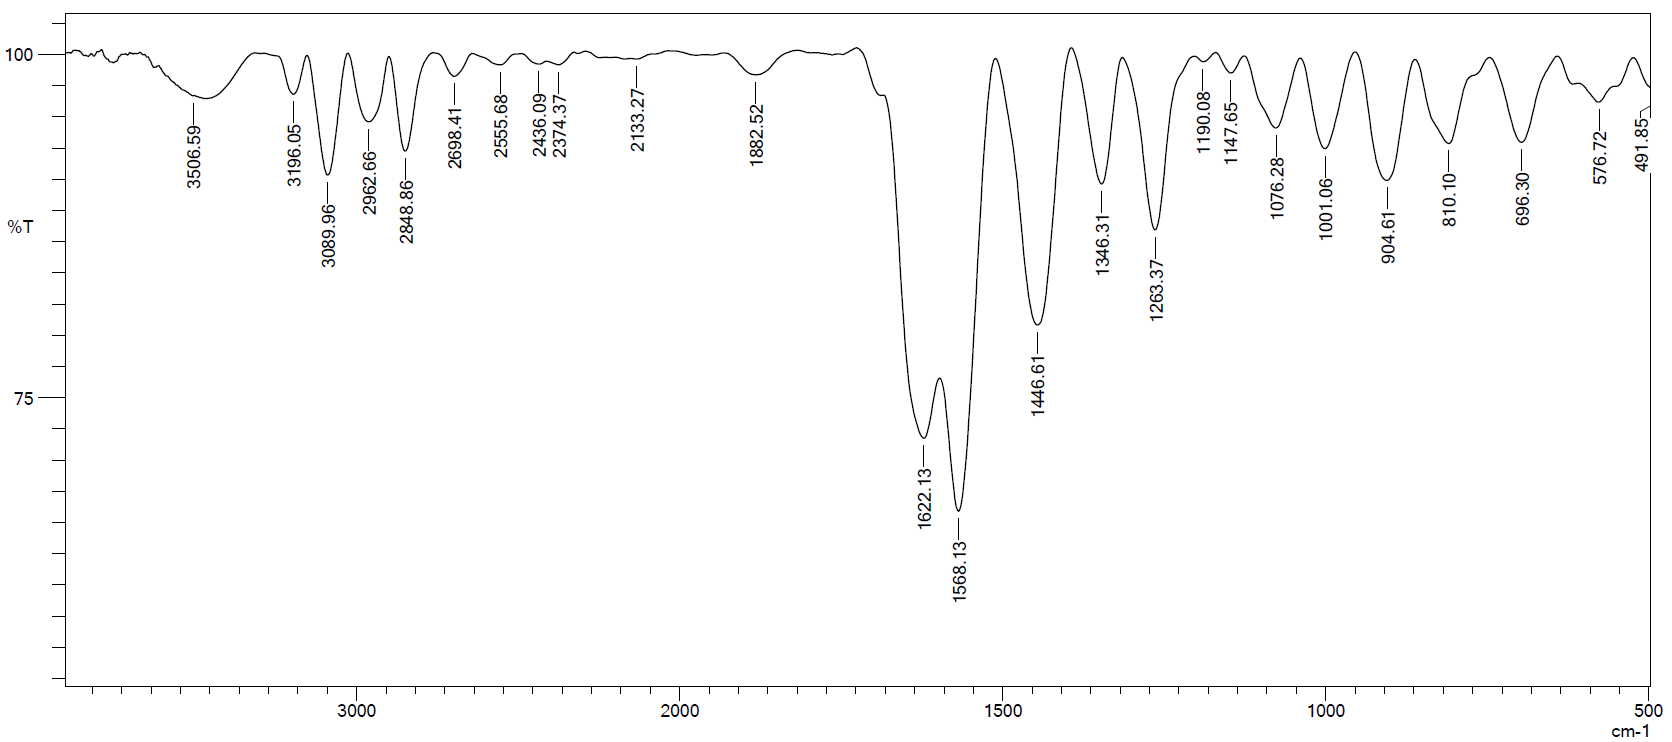
**

**IR spectrum of (9-(7H-pyrrolo[2,3-d]pyrimidin-4-yl)-3,9-diazaspiro[5.5]undecan-3-yl)(4-bromo-2-chlorophenyl)methanone (18b)**

**1H NMR spectrum of (9-(7H-pyrrolo[2,3-d]pyrimidin-4-yl)-3,9-diazaspiro[5.5]undecan-3-yl)(4-bromo-2-chlorophenyl)methanone (18b)**

**1H NMR spectrum of (9-(7H-pyrrolo[2,3-d]pyrimidin-4-yl)-3,9-diazaspiro[5.5]undecan-3-yl)(4-bromo-2-chlorophenyl)methanone (18b)**

**13C NMR spectrum of (9-(7H-pyrrolo[2,3-d]pyrimidin-4-yl)-3,9-diazaspiro[5.5]undecan-3-yl)(4-bromo-2-chlorophenyl)methanone (18b)**

**
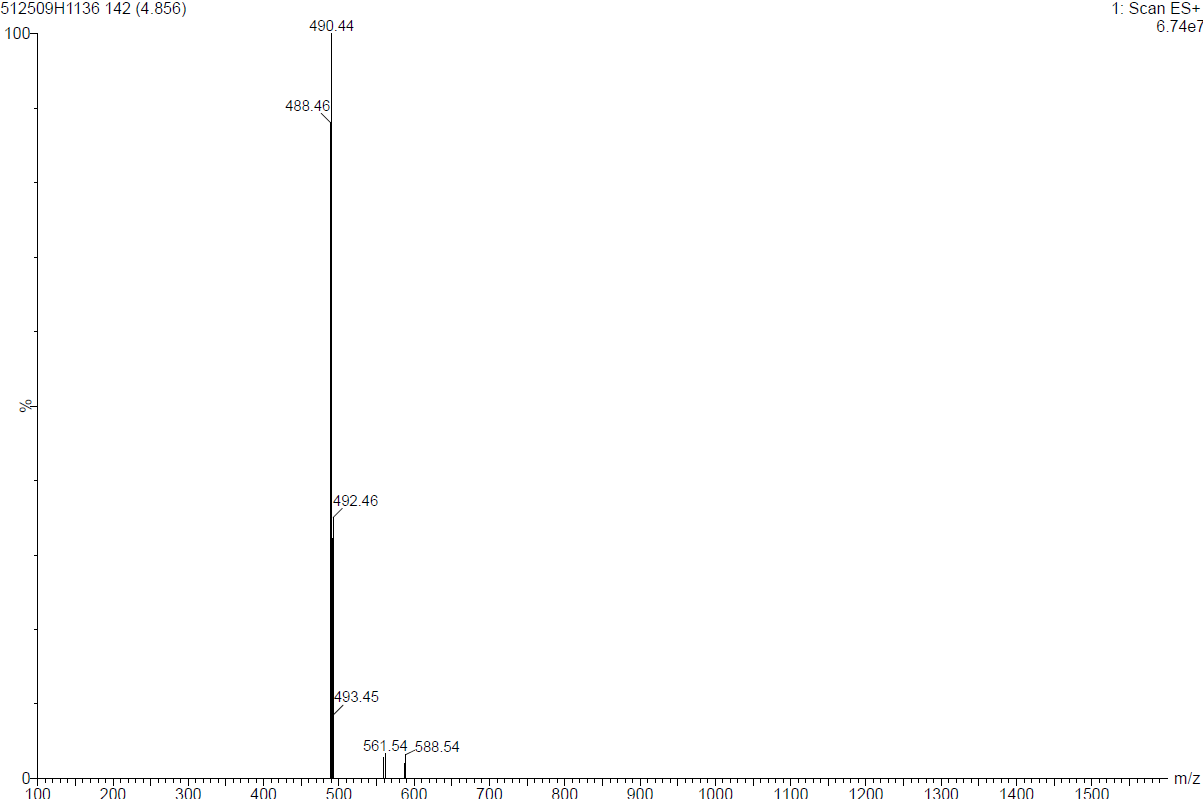
**

**Mass spectrum of (9-(7H-pyrrolo[2,3-d]pyrimidin-4-yl)-3,9-diazaspiro[5.5]undecan-3-yl)(4-bromo-2-chlorophenyl)methanone (18b)**

**
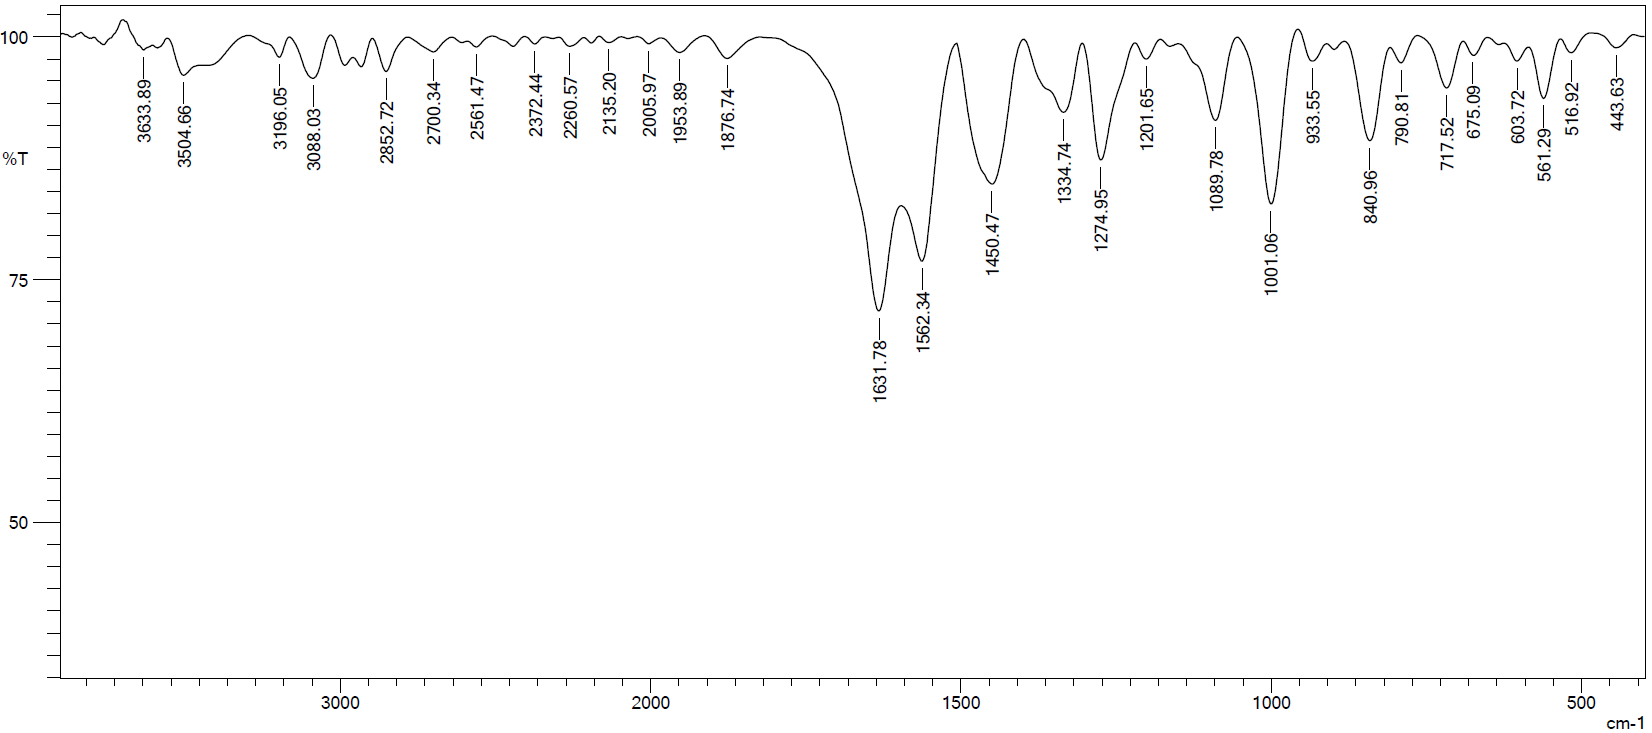
**

**IR spectrum of (9-(7H-pyrrolo[2,3-d]pyrimidin-4-yl)-3,9-diazaspiro[5.5]undecan-3-yl)(2,6-difluorophenyl)methanone (18c)**

**1H NMR spectrum of (9-(7H-pyrrolo[2,3-d]pyrimidin-4-yl)-3,9-diazaspiro[5.5]undecan-3-yl)(2,6-difluorophenyl)methanone (18c)**

**13C NMR spectrum of (9-(7H-pyrrolo[2,3-d]pyrimidin-4-yl)-3,9-diazaspiro[5.5]undecan-3-yl)(2,6-difluorophenyl)methanone (18c)**

**
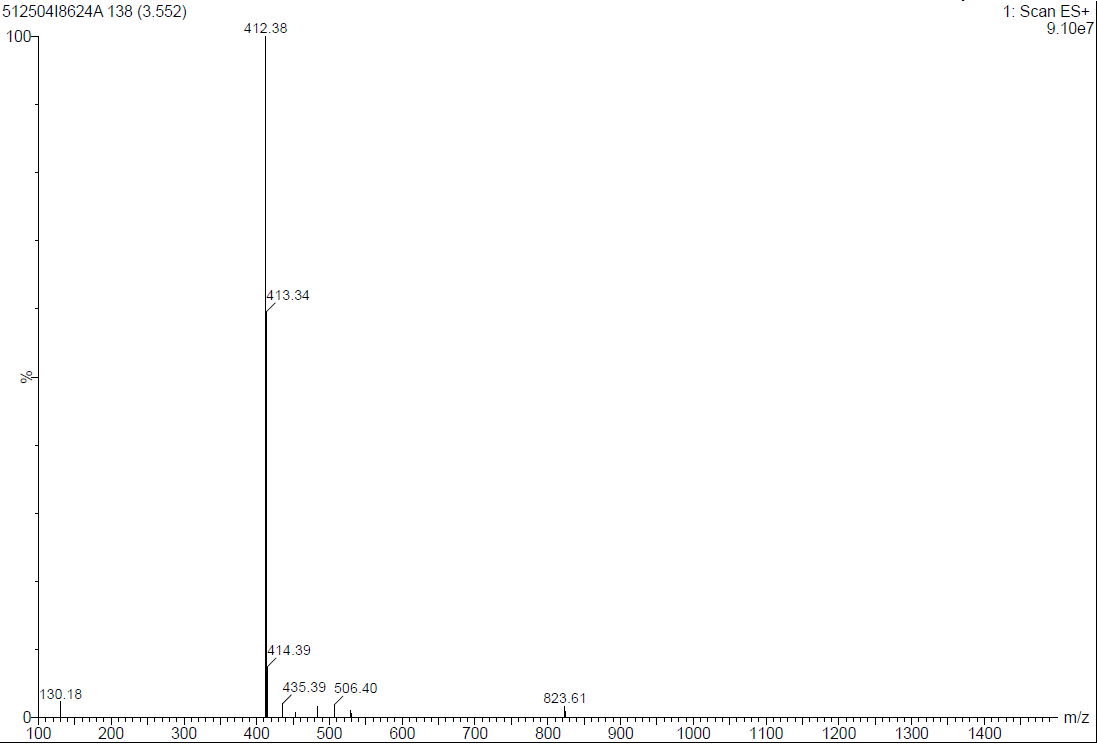
**

**Mass spectrum of (9-(7H-pyrrolo[2,3-d]pyrimidin-4-yl)-3,9-diazaspiro[5.5]undecan-3-yl)(2,6-difluorophenyl)methanone (18c)**

**
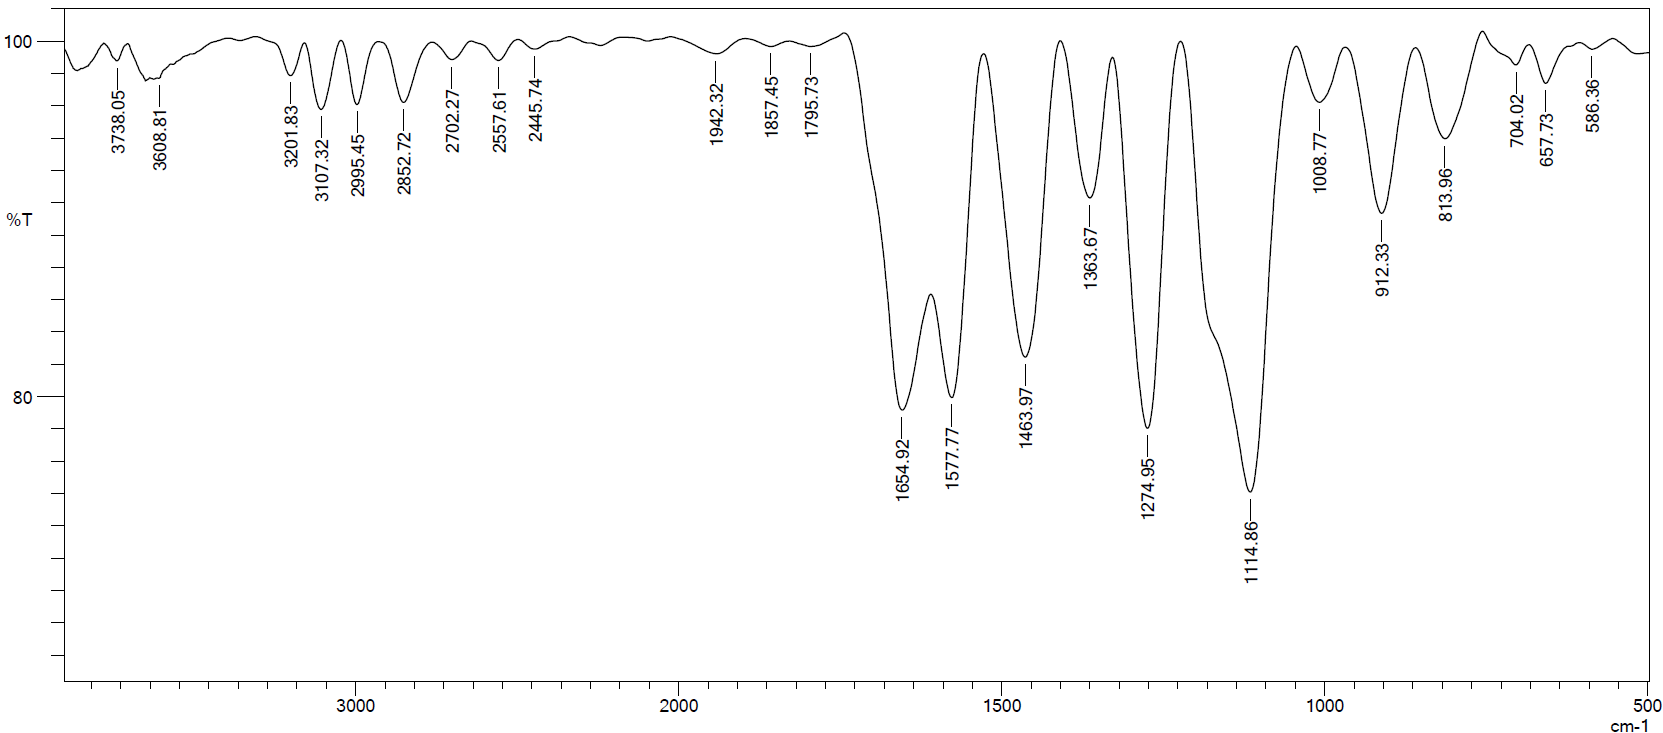
**

**IR spectrum of (9-(7H-pyrrolo[2,3-d]pyrimidin-4-yl)-3,9-diazaspiro[5.5]undecan-3-yl)(2,6-bis(trifluoromethyl)phenyl)methanone (18d)**

**1H NMR spectrum of (9-(7H-pyrrolo[2,3-d]pyrimidin-4-yl)-3,9-diazaspiro[5.5]undecan-3-yl)(2,6-bis(trifluoromethyl)phenyl)methanone (18d)**

**13C NMR spectrum of (9-(7H-pyrrolo[2,3-d]pyrimidin-4-yl)-3,9-diazaspiro[5.5]undecan-3-yl)(2,6-bis(trifluoromethyl)phenyl)methanone (18d)**

**
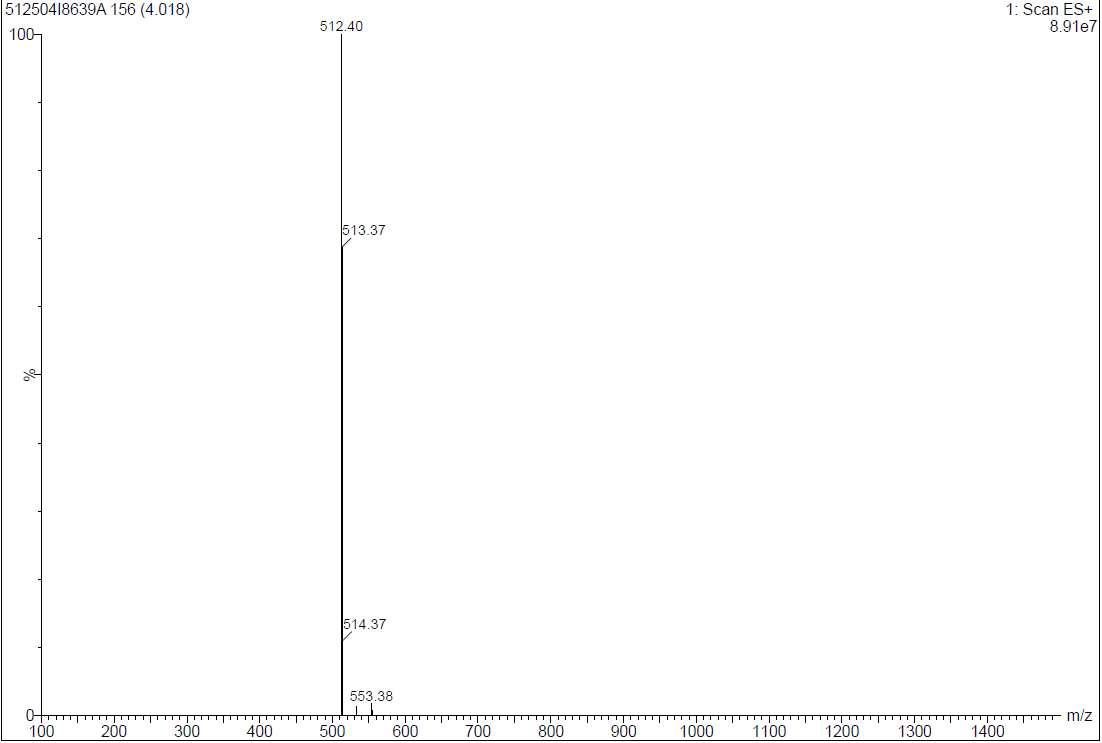
**

**Mass spectrum of (9-(7H-pyrrolo[2,3-d]pyrimidin-4-yl)-3,9-diazaspiro[5.5]undecan-3-yl)(2,6-bis(trifluoromethyl)phenyl)methanone (18d)**

**
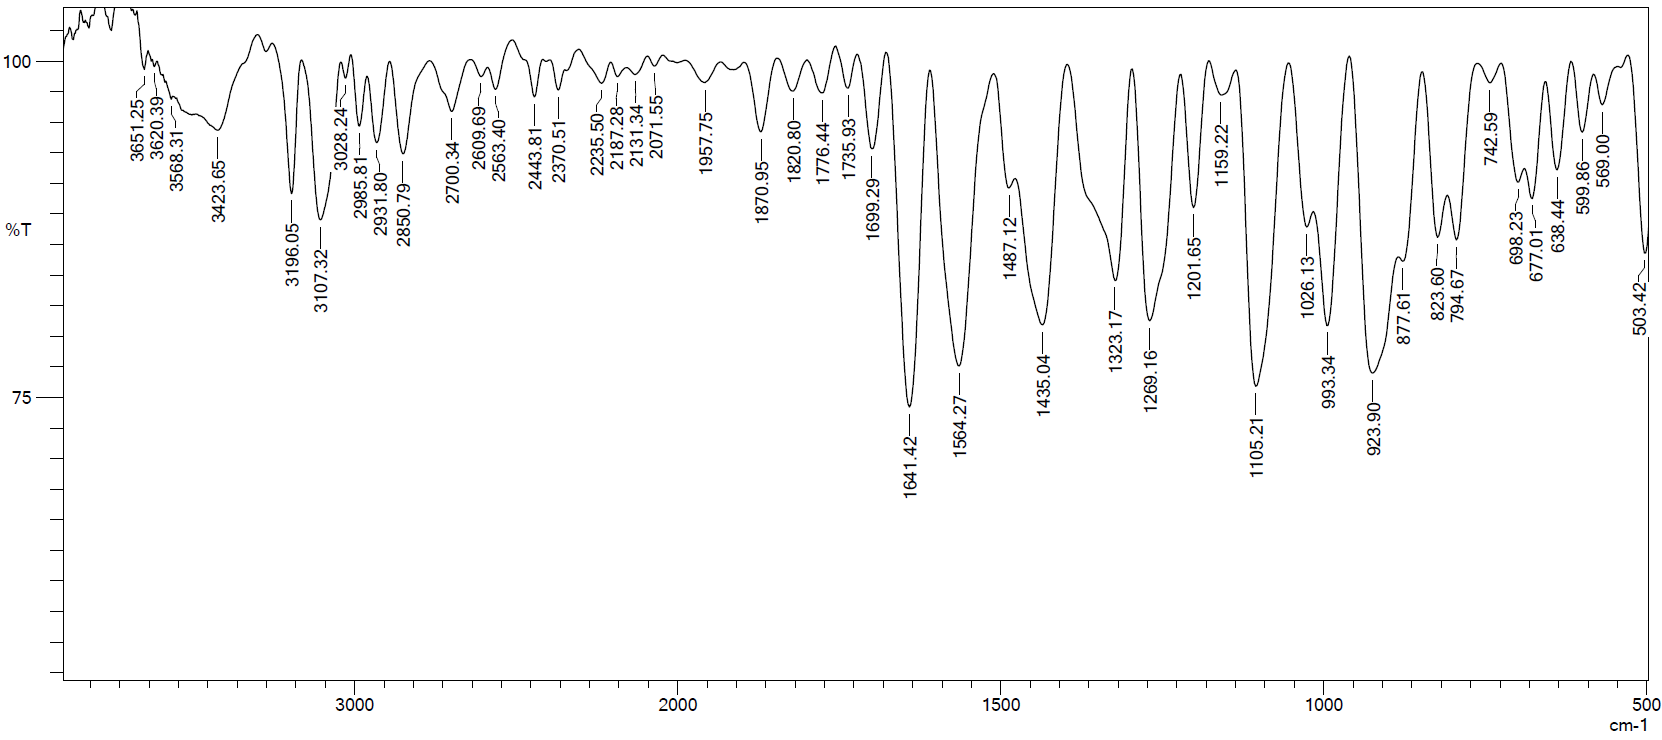
**

**IR spectrum of (9-(7H-pyrrolo[2,3-d]pyrimidin-4-yl)-3,9-diazaspiro[5.5]undecan-3-yl)(2-chloropyridin-4-yl)methanone (18e)**

**1H NMR spectrum of (9-(7H-pyrrolo[2,3-d]pyrimidin-4-yl)-3,9-diazaspiro[5.5]undecan-3-yl)(2-chloropyridin-4-yl)methanone (18e)**

**13C NMR spectrum of (9-(7H-pyrrolo[2,3-d]pyrimidin-4-yl)-3,9-diazaspiro[5.5]undecan-3-yl)(2-chloropyridin-4-yl)methanone (18e)**

**
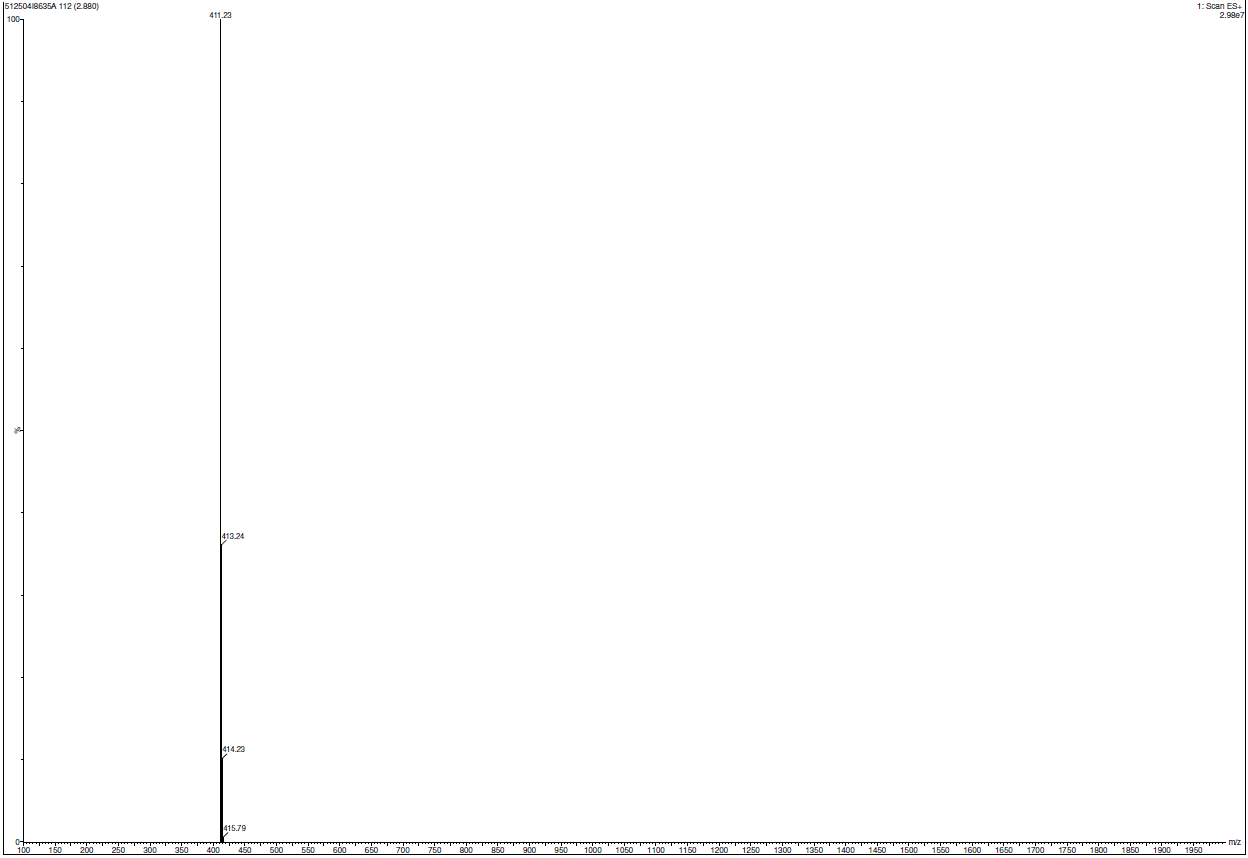
**

**Mass spectrum of (9-(7H-pyrrolo[2,3-d]pyrimidin-4-yl)-3,9-diazaspiro[5.5]undecan-3-yl)(2-chloropyridin-4-yl)methanone (18e)**

**
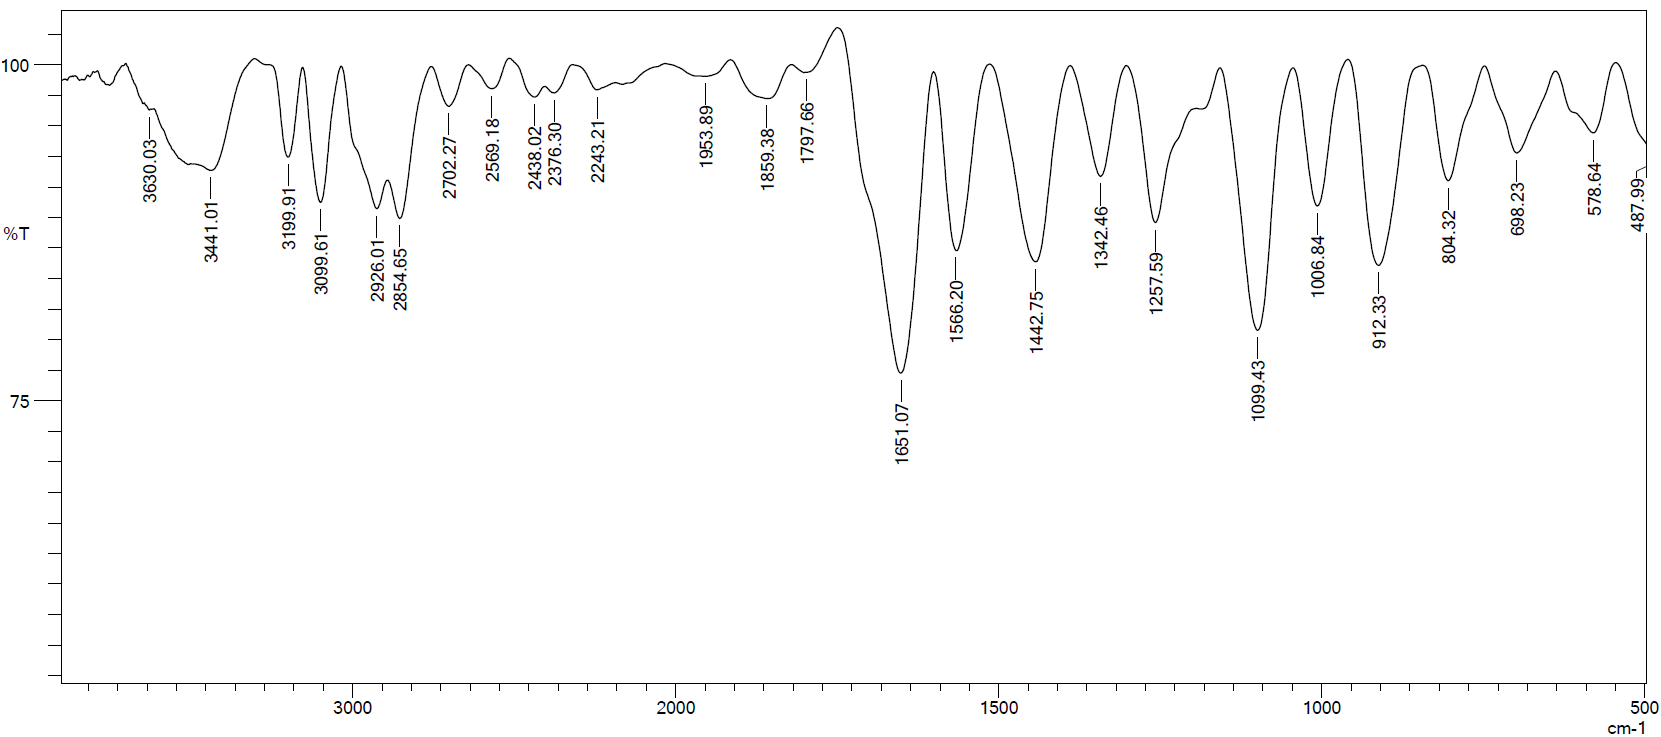
**

**IR spectrum of (9-(7H-pyrrolo[2,3-d]pyrimidin-4-yl)-3,9-diazaspiro[5.5]undecan-3-yl)(5-bromo-2-chloropyridin-4-yl)methanone (18f)**

**1H NMR spectrum of (9-(7H-pyrrolo[2,3-d]pyrimidin-4-yl)-3,9-diazaspiro[5.5]undecan-3-yl)(5-bromo-2-chloropyridin-4-yl)methanone (18f)**

**13C NMR spectrum of (9-(7H-pyrrolo[2,3-d]pyrimidin-4-yl)-3,9-diazaspiro[5.5]undecan-3-yl)(5-bromo-2-chloropyridin-4-yl)methanone (18f)**

**
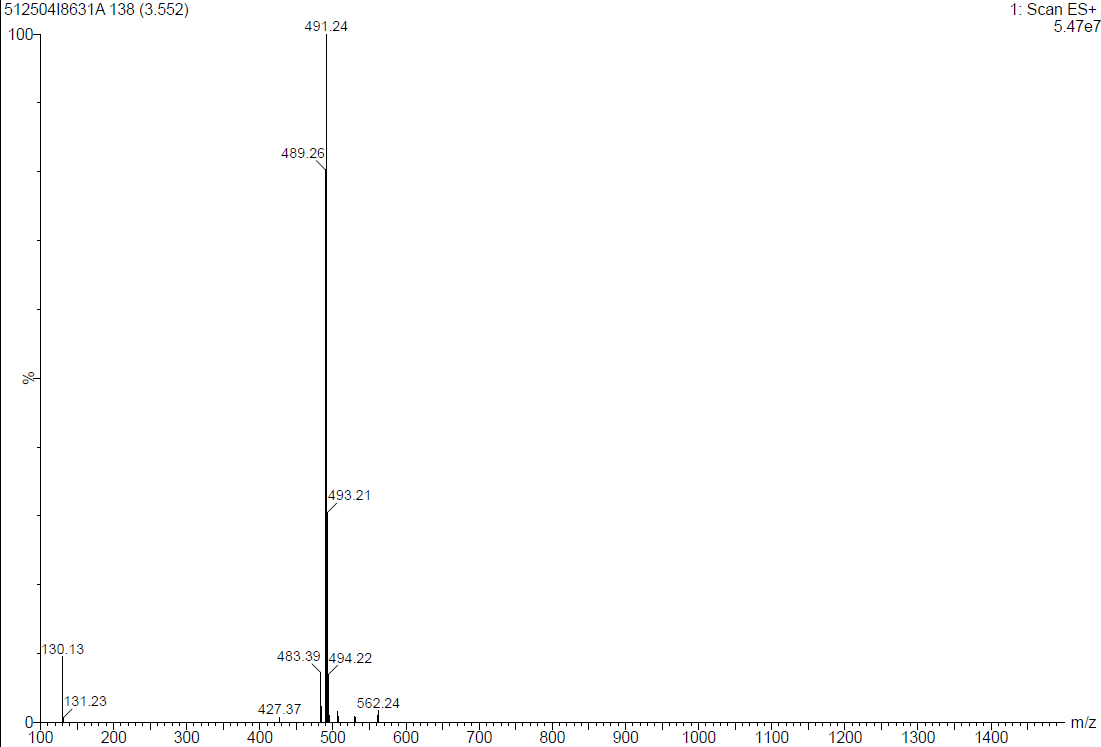
**

**Mass spectrum of (9-(7H-pyrrolo[2,3-d]pyrimidin-4-yl)-3,9-diazaspiro[5.5]undecan-3-yl)(5-bromo-2-chloropyridin-4-yl)methanone (18f)**

**1H NMR spectrum of *tert*-butyl 7-(7-tosyl-7H-pyrrolo[2,3-d]pyrimidin-4-yl)-2,7-diazaspiro[3.5]nonane-2-carboxylate (3)**


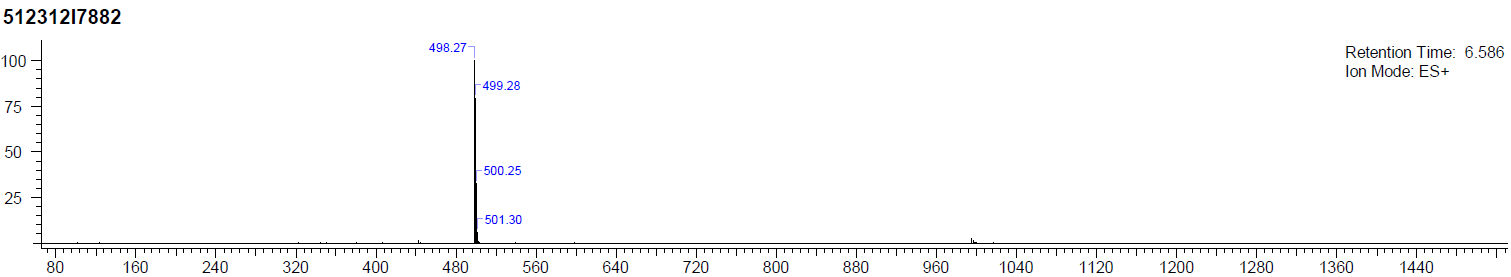


**Mass spectrum of *tert*-butyl 7-(7-tosyl-7H-pyrrolo[2,3-d]pyrimidin-4-yl)-2,7-diazaspiro[3.5]nonane-2-carboxylate (3)**

**1H NMR spectrum of 4-(2,7-diazaspiro[3.5]nonan-7-yl)-7-tosyl-7H-pyrrolo[2,3-d]pyrimidine (4)**


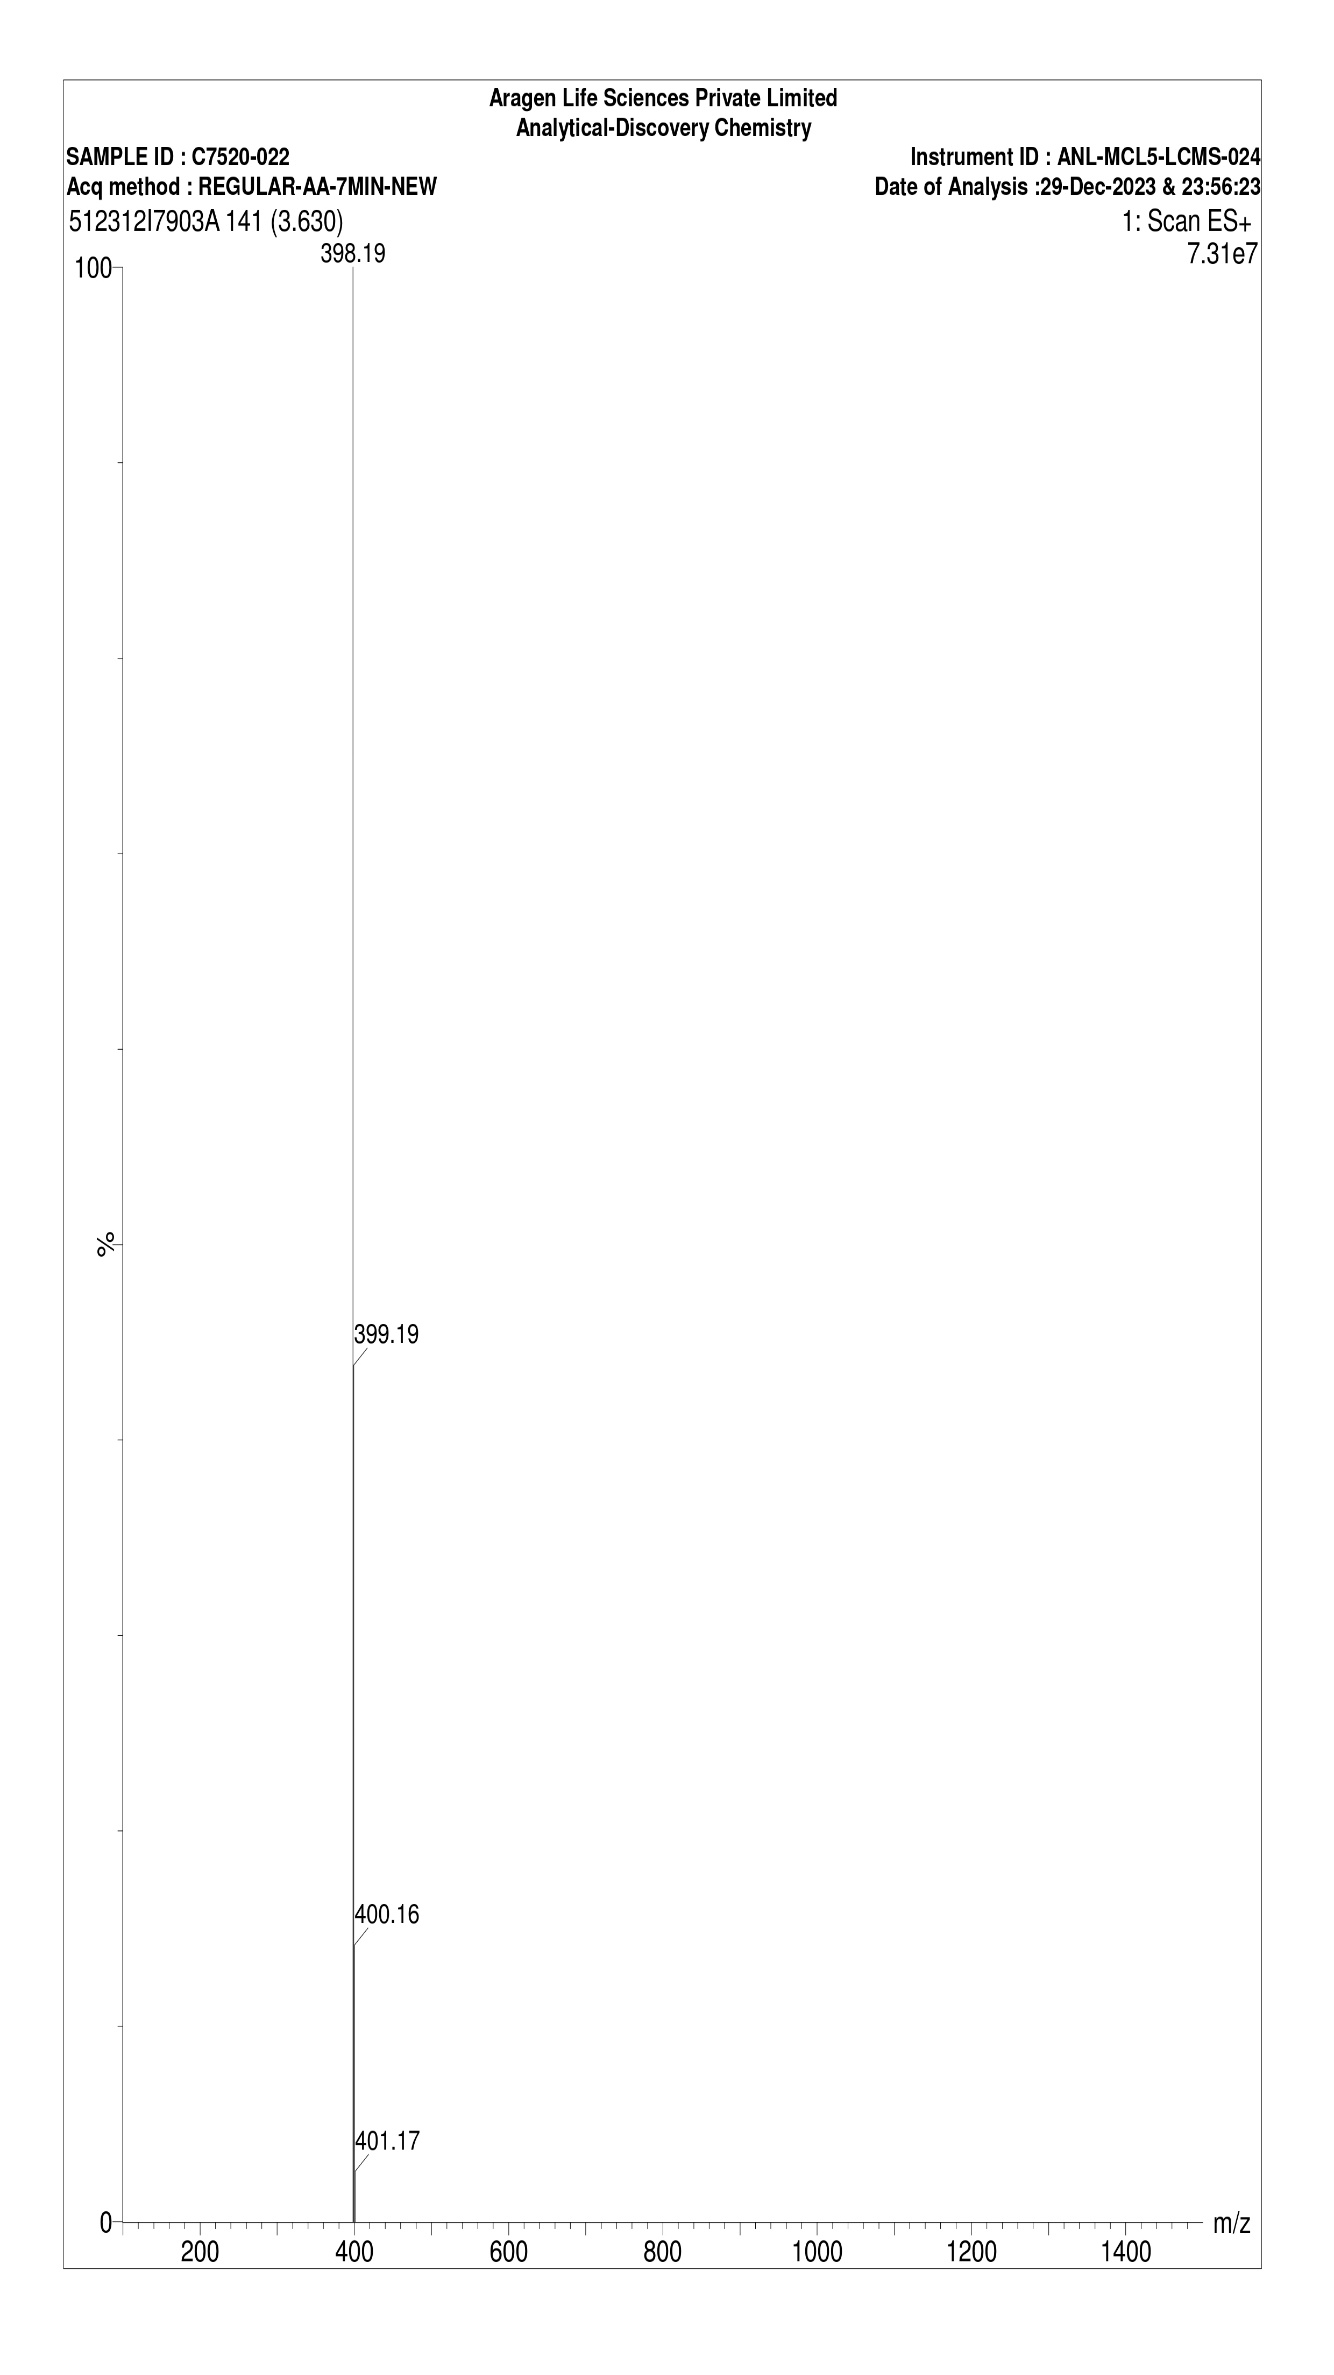


**Mass spectrum of 4-(2,7-diazaspiro[3.5]nonan-7-yl)-7-tosyl-7H-pyrrolo[2,3-d]pyrimidine (4)**

**1H NMR spectrum of 7-*tosyl*-4-(2-((2-(trifluoromethyl)phenyl)sulfonyl)-2,7-diazaspiro[3.5]nonan-7-yl)-7H-pyrrolo[2,3-d]pyrimidine (6a)**


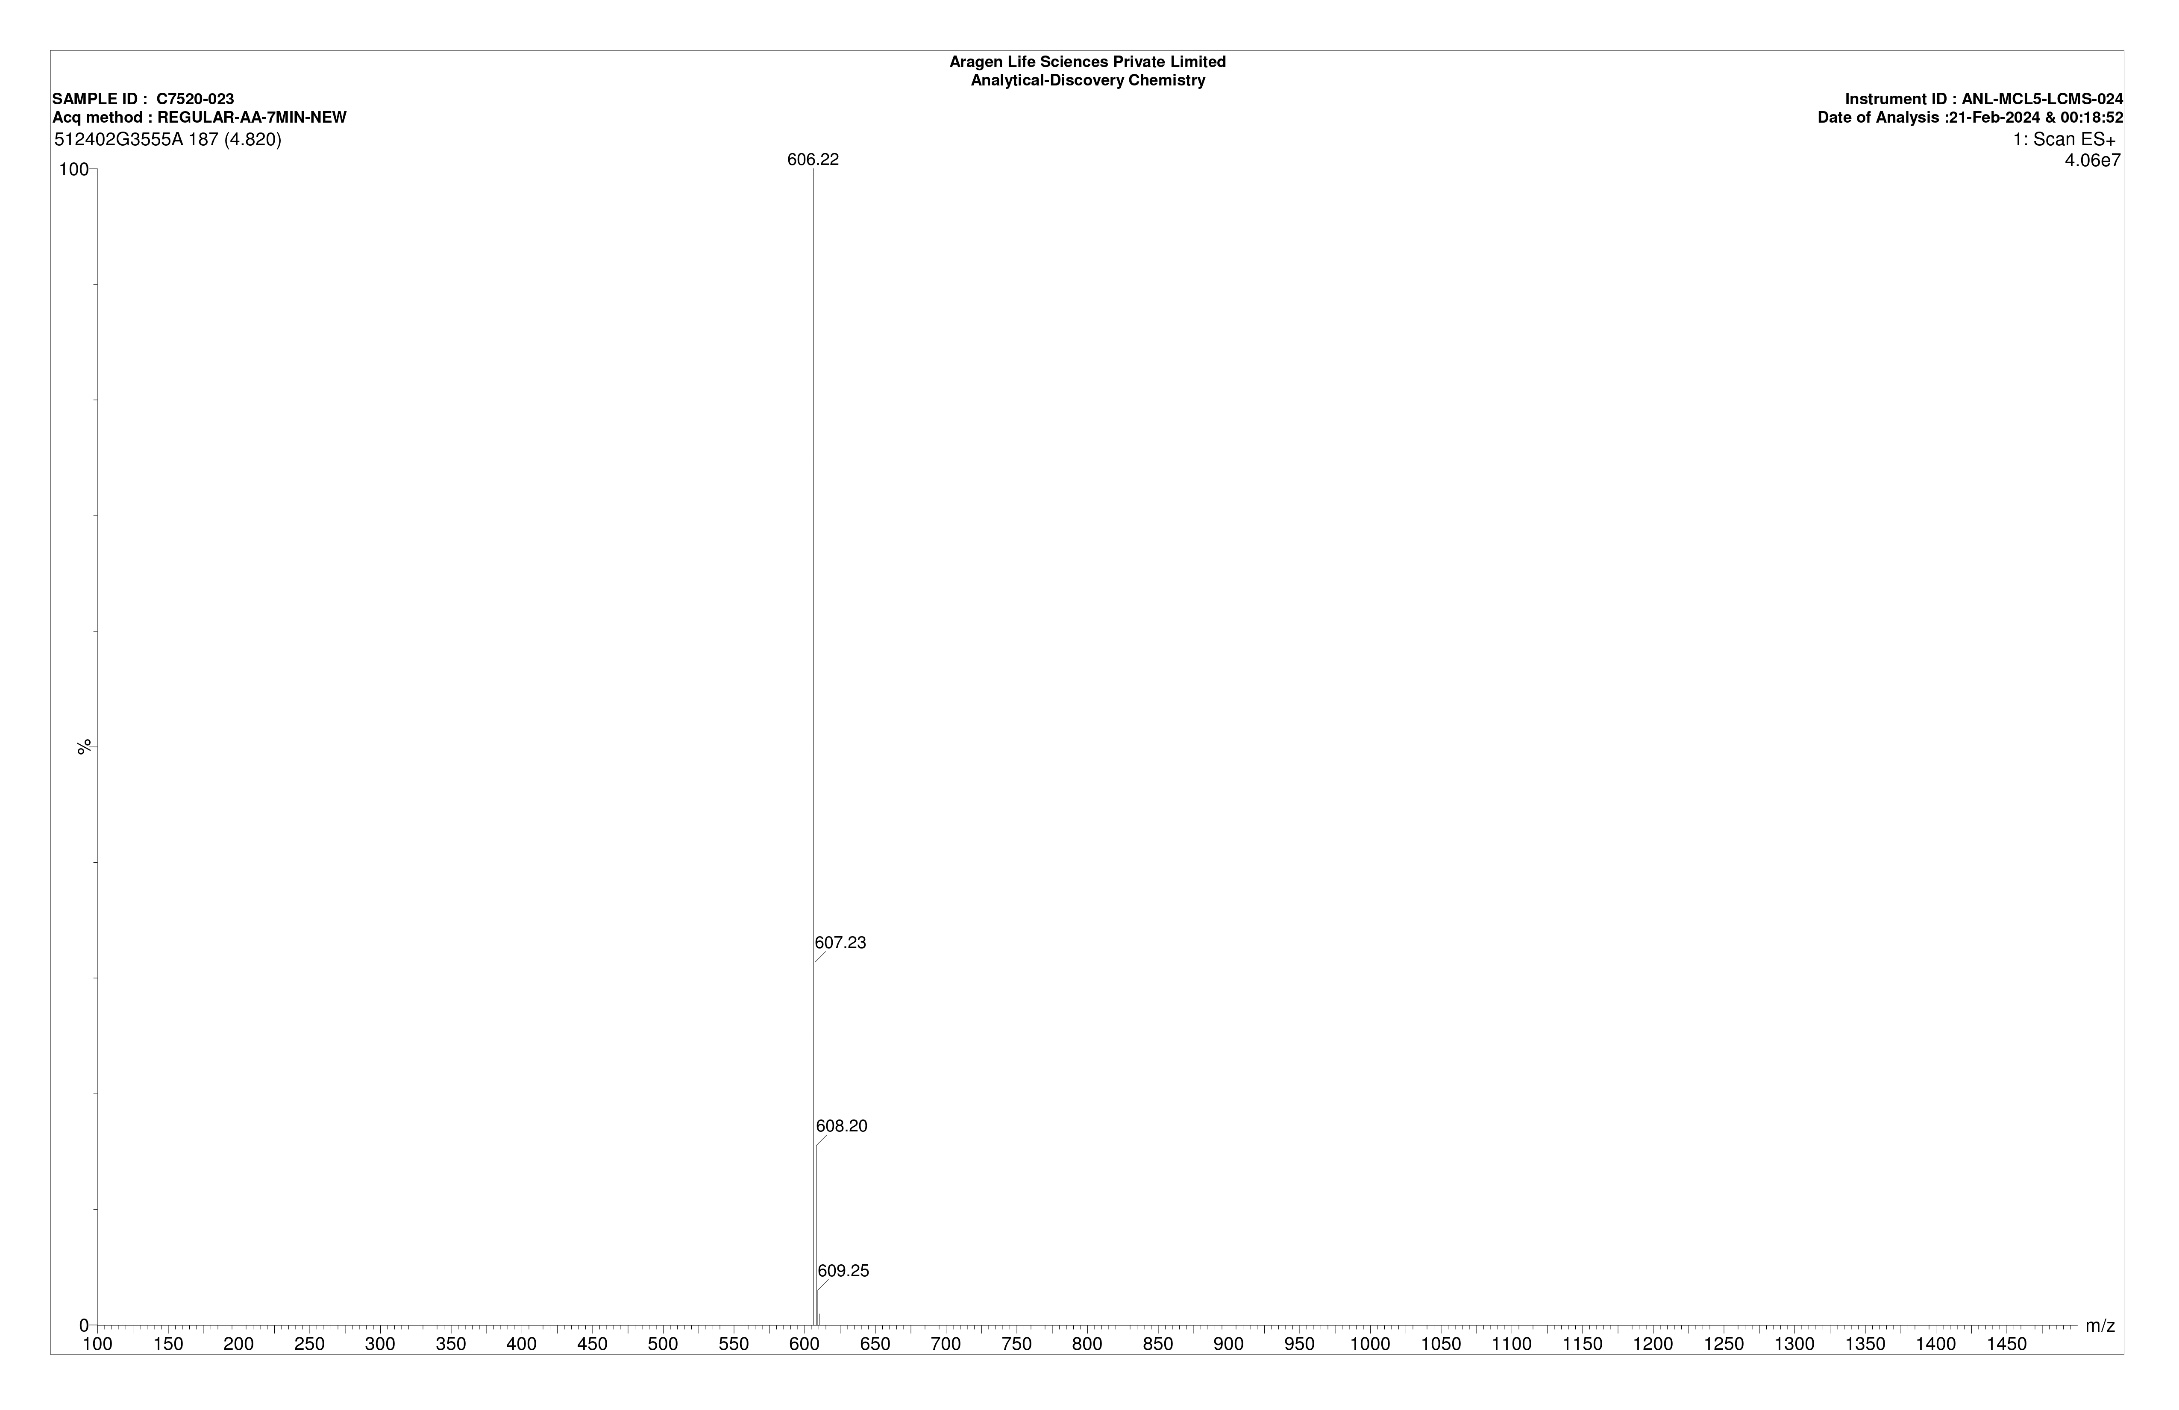


**Mass spectrum of 7-*tosyl*-4-(2-((2-(trifluoromethyl)phenyl)sulfonyl)-2,7-diazaspiro[3.5]nonan-7-yl)-7H-pyrrolo[2,3-d]pyrimidine (6a)**

**1H NMR spectrum of 4-(2-((4-bromophenyl)sulfonyl)-2,7-diazaspiro[3.5]nonan-7-yl)-7-*tosyl*-7H-pyrrolo[2,3-d]pyrimidine (6b)**

**
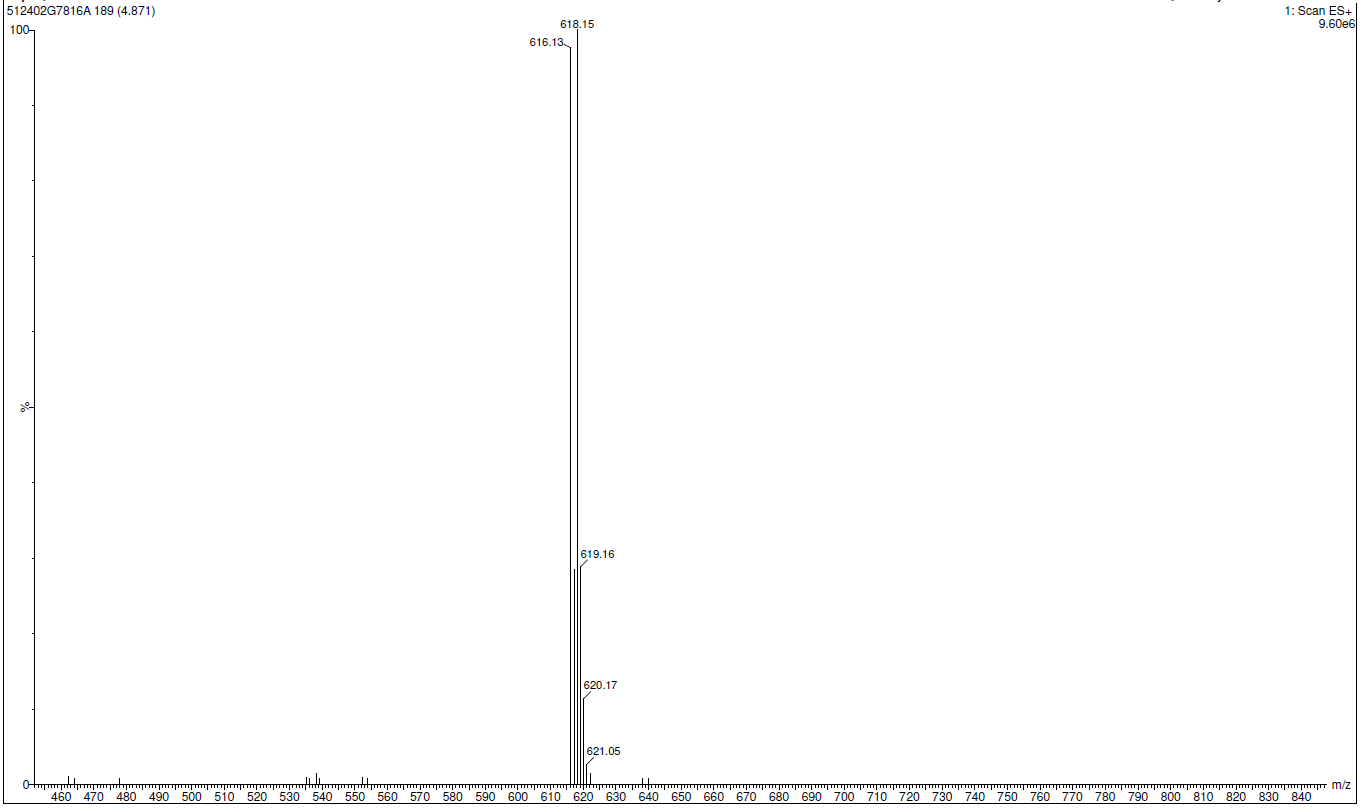
**

**Mass spectrum of 4-(2-((4-bromophenyl)sulfonyl)-2,7-diazaspiro[3.5]nonan-7-yl)-7-*tosyl*-7H-pyrrolo[2,3-d]pyrimidine (6b)**

**1H NMR spectrum of 4-(2-((3-bromophenyl)sulfonyl)-2,7-diazaspiro[3.5]nonan-7-yl)-7-tosyl-7H-pyrrolo[2,3-d]pyrimidine (6c)**

**
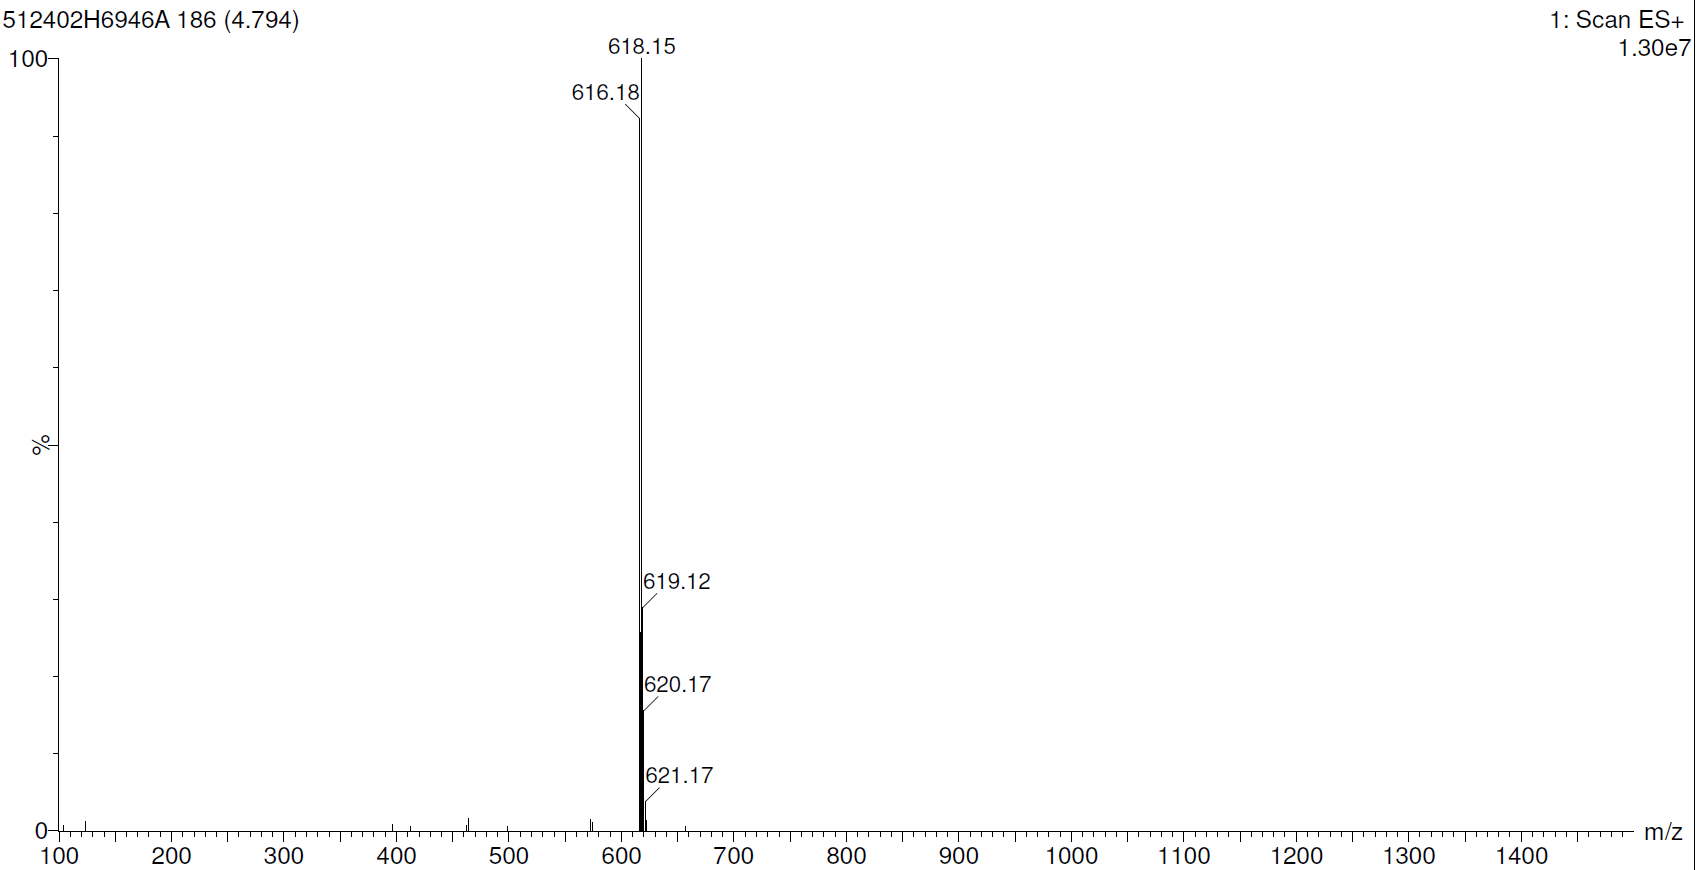
**

**Mass spectrum of 4-(2-((3-bromophenyl)sulfonyl)-2,7-diazaspiro[3.5]nonan-7-yl)-7-tosyl-7H-pyrrolo[2,3-d]pyrimidine (6c)**

**1H NMR spectrum of 4-(2-((cyclopropylmethyl)sulfonyl)-2,7-diazaspiro[3.5]nonan-7-yl)-7-tosyl-7H-pyrrolo[2,3-d]pyrimidine (6d)**

**
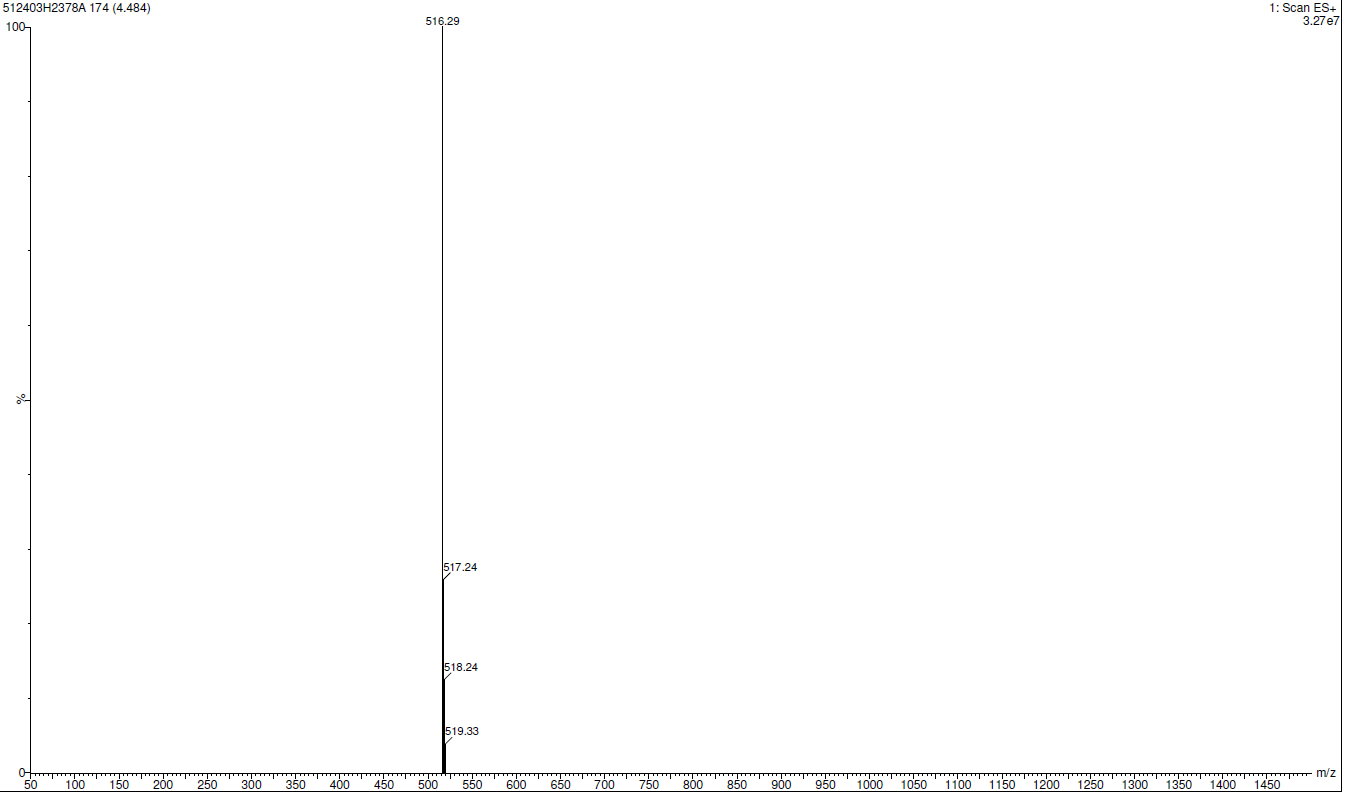
**

**Mass spectrum of 4-(2-((cyclopropylmethyl)sulfonyl)-2,7-diazaspiro[3.5]nonan-7-yl)-7-tosyl-7H-pyrrolo[2,3-d]pyrimidine (6d)**

**1H NMR spectrum of 4-(2-(propylsulfonyl)-2,7-diazaspiro[3.5]nonan-7-yl)-7-tosyl-7H-pyrrolo[2,3-d]pyrimidine (6e)**

**
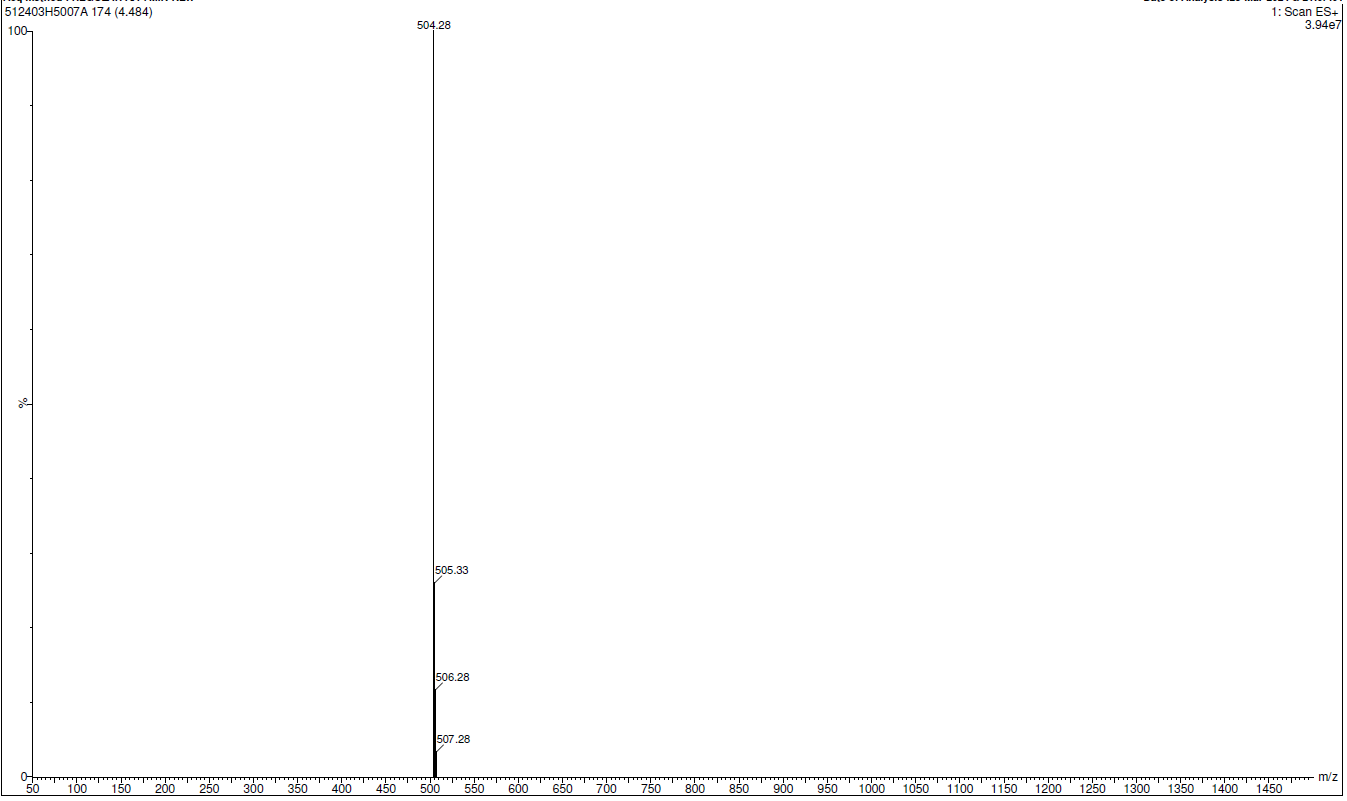
**

**Mass spectrum of 4-(2-(propylsulfonyl)-2,7-diazaspiro[3.5]nonan-7-yl)-7-tosyl-7H-pyrrolo[2,3-d]pyrimidine (6e)**

**1H NMR spectrum of *tert*-butyl 4-((4-(7-*tosyl*-7*H*-pyrrolo[2,3-d]pyrimidin-4-yl)piperazin-1-yl)methyl) piperidine-1-carboxylate (9)**

**
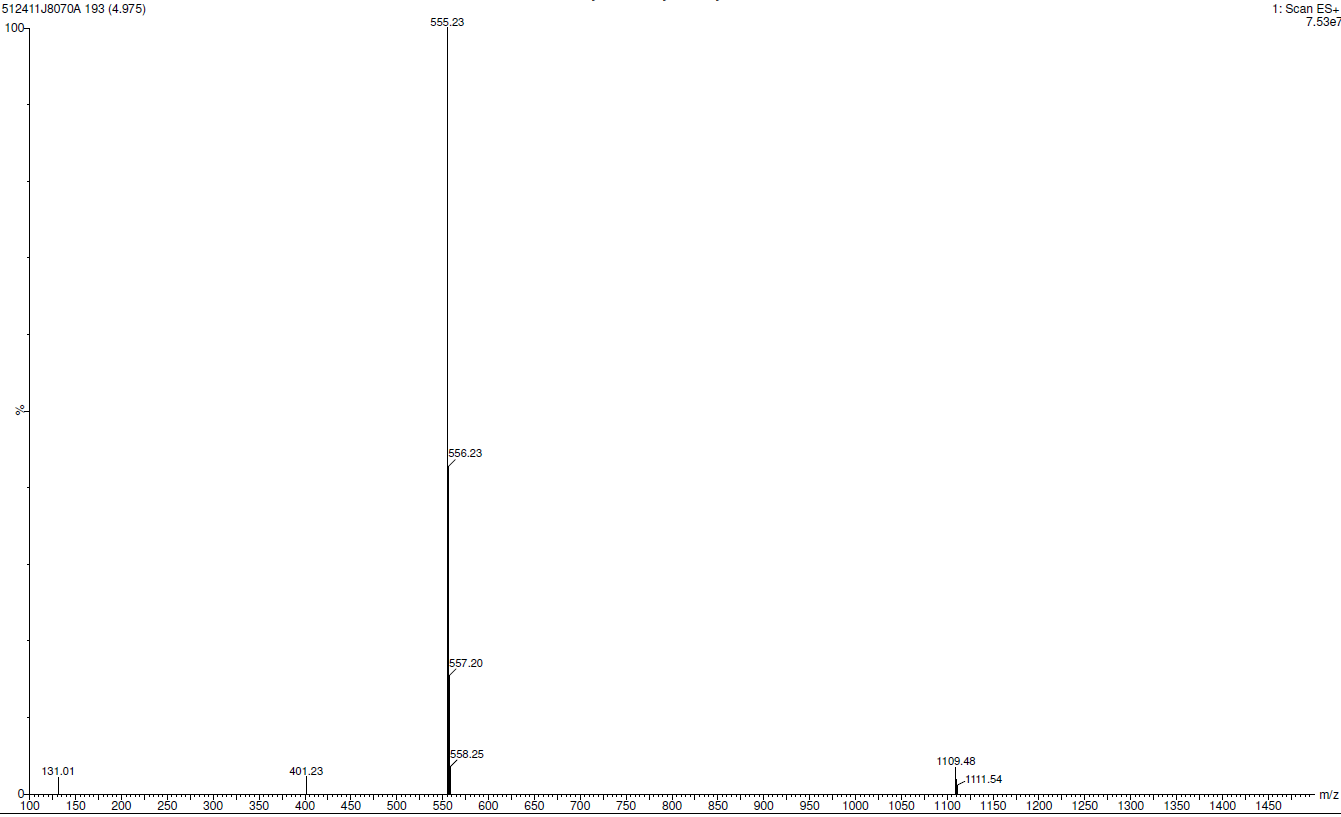
**

**Mass spectrum of *tert*-butyl 4-((4-(7-*tosyl*-7*H*-pyrrolo[2,3-d]pyrimidin-4-yl)piperazin-1-yl)methyl) piperidine-1-carboxylate (9)**

**1H NMR spectrum of 4-(4-(piperidin-4-ylmethyl)piperazin-1-yl)-7-*tosyl*-7*H*-pyrrolo[2,3-d]pyrimidine (10)**

**
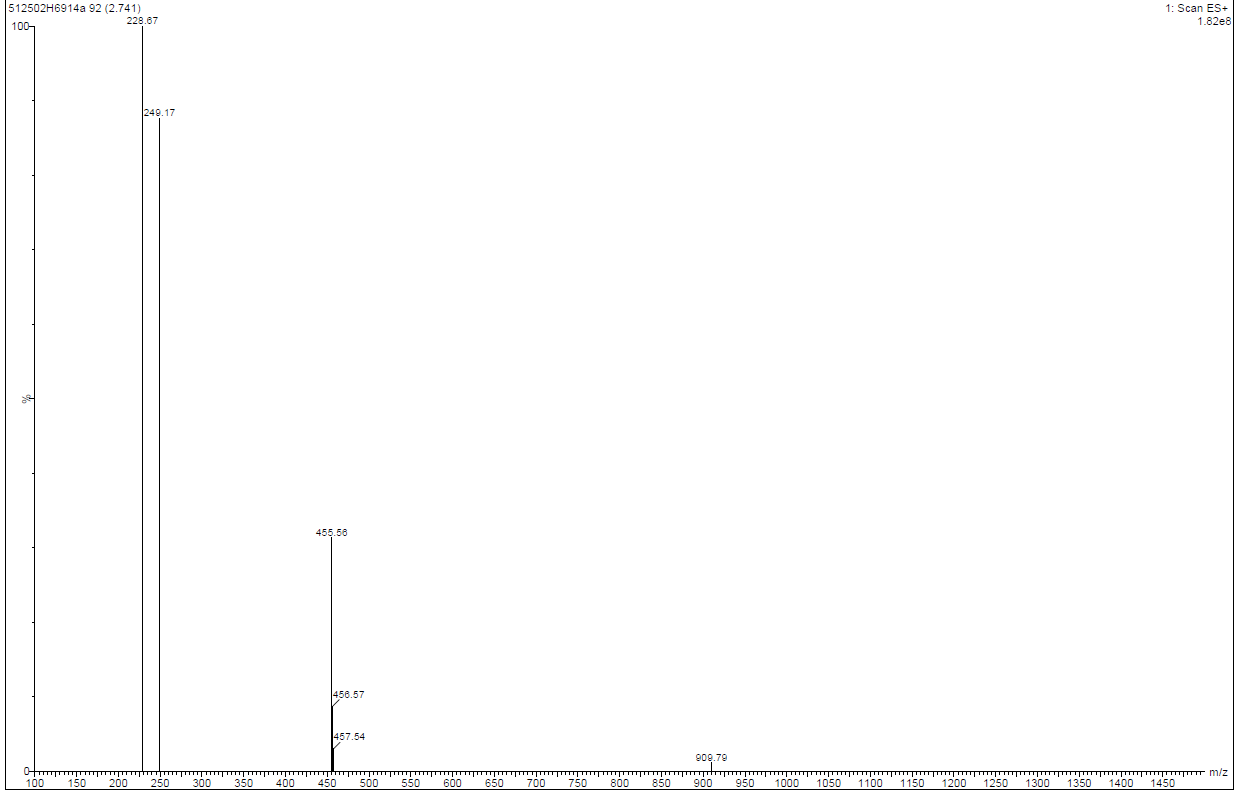
**

**Mass spectrum of 4-(4-(piperidin-4-ylmethyl)piperazin-1-yl)-7-*tosyl*-7*H*-pyrrolo[2,3-d]pyrimidine (10)**

**1H NMR spectrum of 7-*tosyl*-4-(4-((1-((2-(trifluoromethyl)phenyl)sulfonyl)piperidin-4-yl)methyl)piperazin-1-yl)-7*H*-pyrrolo[2,3-d]pyrimidine (11a)**

**
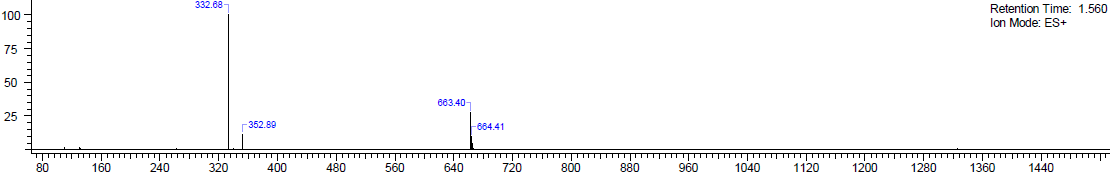
**

**Mass spectrum of 7-*tosyl*-4-(4-((1-((2-(trifluoromethyl)phenyl)sulfonyl)piperidin-4-yl)methyl)piperazin-1-yl)-7*H*-pyrrolo[2,3-d]pyrimidine (11a)**

**1H NMR spectrum of 4-(4-((1-((4-bromophenyl)sulfonyl)piperidin-4-yl)methyl)piperazin-1-yl)-7-*tosyl*-7*H*-pyrrolo[2,3-d]pyrimidine (11b)**

**
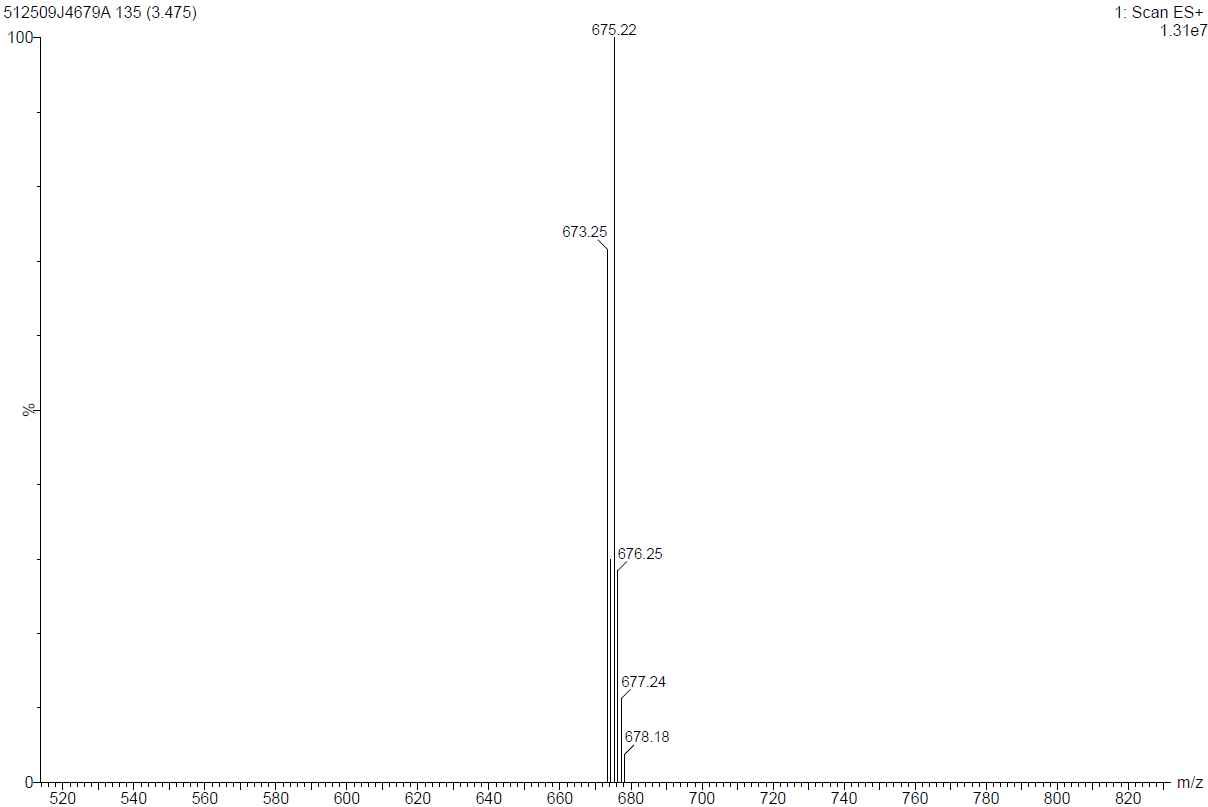
**

**Mass spectrum of 4-(4-((1-((4-bromophenyl)sulfonyl)piperidin-4-yl)methyl)piperazin-1-yl)-7-*tosyl*-7*H*-pyrrolo[2,3-d]pyrimidine (11b)**

**1H NMR spectrum of 4-(4-((1-((cyclopropylmethyl)sulfonyl)piperidin-4-yl)methyl)piperazin-1-yl)-7-tosyl-7H-pyrrolo[2,3-d]pyrimidine (11d)**

**
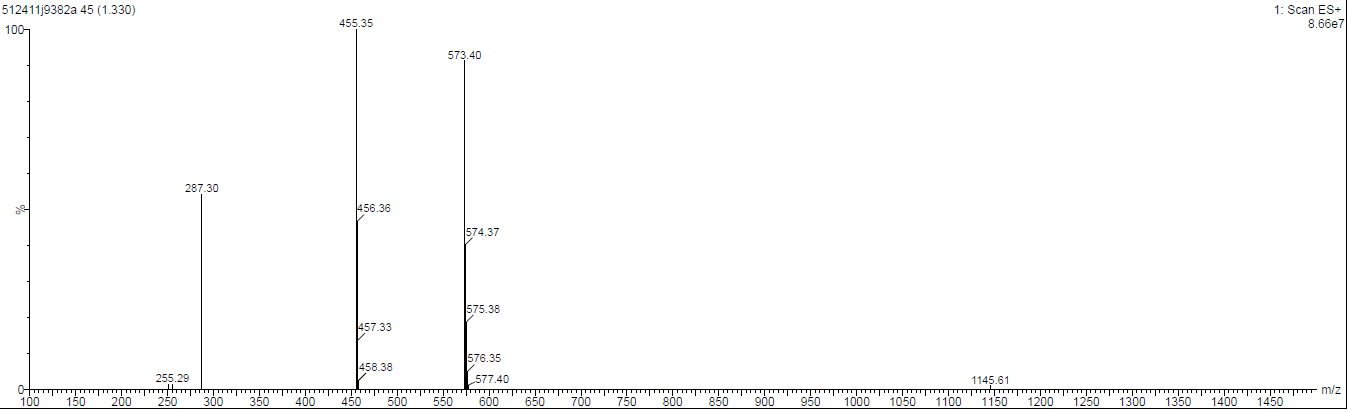
**

**Mass spectrum of 4-(4-((1-((cyclopropylmethyl)sulfonyl)piperidin-4-yl)methyl)piperazin-1-yl)-7-tosyl-7H-pyrrolo[2,3-d]pyrimidine (11d)**

**1H NMR spectrum of 4-(4-((1-(propylsulfonyl)piperidin-4-yl)methyl)piperazin-1-yl)-7-tosyl-7H-pyrrolo[2,3-d]pyrimidine (11e)**

**
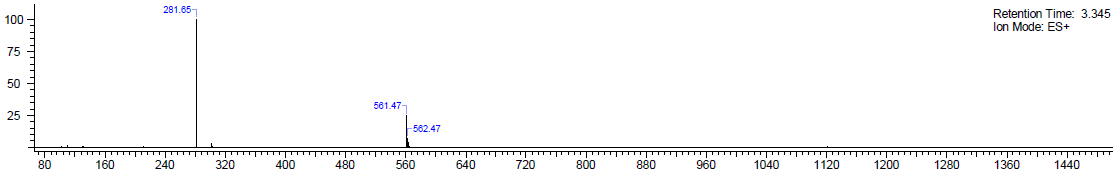
**

**Mass spectrum of 4-(4-((1-(propylsulfonyl)piperidin-4-yl)methyl)piperazin-1-yl)-7-tosyl-7H-pyrrolo[2,3-d]pyrimidine (11e)**

**1H NMR spectrum of *tert*-butyl 9-(7H-pyrrolo[2,3-d]pyrimidin-4-yl)-3,9-diazaspiro[5.5]undecane-3-carboxylate (15)**

**
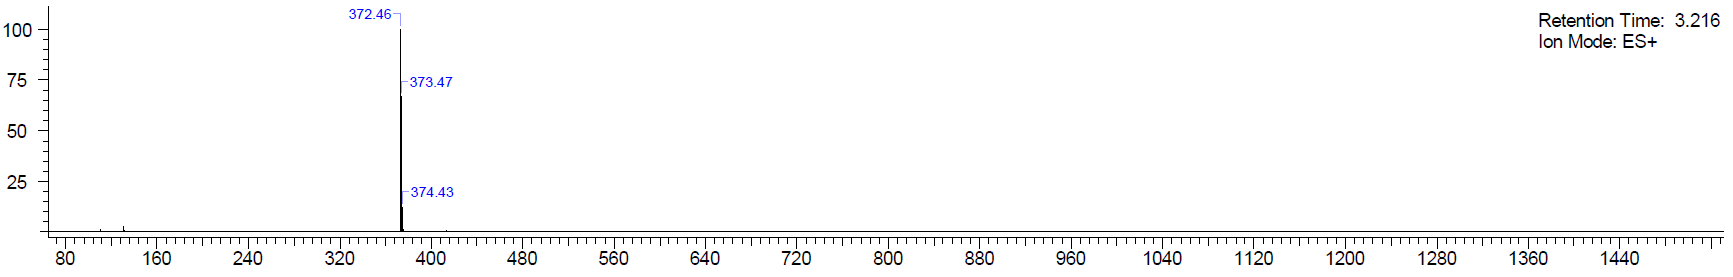
**

**Mass spectrum of *tert*-butyl 9-(7H-pyrrolo[2,3-d]pyrimidin-4-yl)-3,9-diazaspiro[5.5]undecane-3-carboxylate (15)**

**1H NMR spectrum of 3-(7H-pyrrolo[2,3-d]pyrimidin-4-yl)-3,9-diazaspiro[5.5]undecane (16)**

**
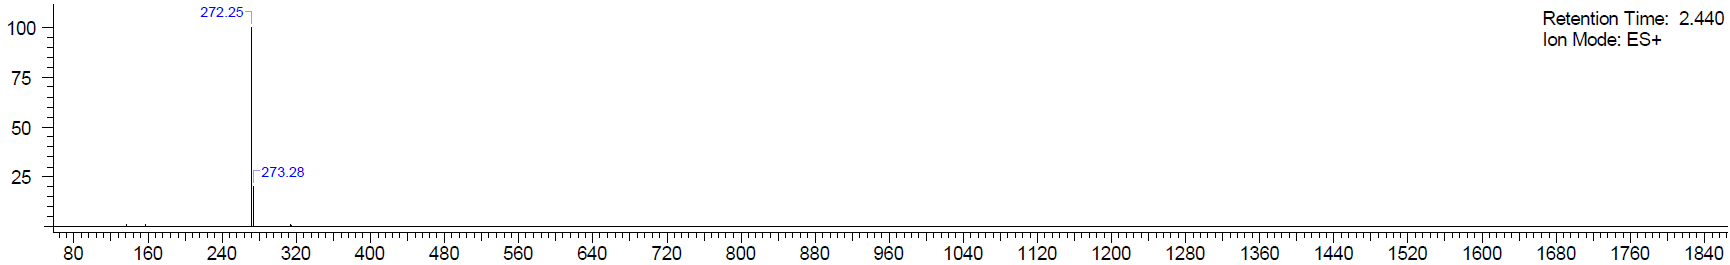
**

**Mass spectrum of 3-(7H-pyrrolo[2,3-d]pyrimidin-4-yl)-3,9-diazaspiro[5.5]undecane (16)**
